# Supplementary material for: Measuring protein stability in the GroEL chaperonin cage reveals massive destabilization
Source: eLife. 2020 Jul 27;9:e56511. doi: 10.7554/eLife.56511 (PMC7440923; doi:10.7554/eLife.56511)
Supplement: Figure 2—source data 1. [file elife-56511-fig2-data1.xlsx]

## Sheet: Sheet1
Temperature (oC)	4	4.5	5	5.5	6	6.5	7	7.5	8	8.5	9	9.5	10	10.5	11	11.5	12	12.5	13	13.5	14	14.5	15	15.5	16	16.5	17	17.5	18	18.5	19	19.5	20	20.5	21	21.5	22	22.5	23	23.5	24	24.5	25	25.5	26	26.5	27	27.5	28
mpDHFR 1	18164.3	17789.6	17628.2	17301.6	17238.4	17006.7	16798.2	16440.7	16356.7	16054.5	15828.4	15682.3	15391.8	15247.5	15029.4	14955.7	14591.4	14342.3	14211.7	14003.7	13731.8	13634	13353.7	13227.9	13021.3	12825.8	12618.5	12553.5	12409.9	12191.1	12039.8	11890.3	11824.4	11732.8	11666.2	11651	11616.3	11534.1	11650.7	11583.9	11770.2	11673.5	11842.1	11968.4	12055.9	12279.2	12427	12640.3	12746.5
mpDHFR 2	20651.3	20177.7	20131.3	20038.3	19671.3	19634.8	19396.8	19072.4	19302.1	18748.4	18670	18144.7	18573.7	18089	17992.6	17670.4	17566.9	17439.5	16826.9	17185.1	16792.2	16640.7	16300.4	16440.3	16045	15921.3	15716.2	15574.6	15568.9	15289.1	15091.2	14914.6	15102.8	14821.4	14571.7	14654.5	14526.4	14611.4	14697.4	14586.2	14548.7	14604.2	14538.6	14654.3	14974.3	15043.5	15006.5	15297.6	15326.4
mpDHFR 3	16770.1	17045.5	16210.8	16500.4	16409.2	16265.8	16094.7	15173.4	15362.7	15438	15206.7	15142.9	14527.4	14484.5	13943	14389.7	13819.3	13561.5	12922	13365.5	13073.9	12879.4	12853.3	12529	12494.1	12167.3	11563	12113.5	11255.3	11231.8	10986.3	11691.8	11548	11165.3	11438.4	11433.3	11387.8	11383.1	11455.9	11433.8	11560.4	11712.6	11672.3	11961.5	12307.1	12348.2	12721.8	12643.3	12928.9
mpDHFR 4	17387.3	17090.3	16857.2	16679	16434.7	16233.5	16052.8	15884.3	15602.6	15345.9	15116.4	14941.3	14746.5	14518.4	14327.5	14051.9	13960	13750	13599	13386.6	13126.5	12952.8	12784.3	12591.3	12358.6	12239.9	12078.1	11880.6	11812.6	11715.7	11602.5	11505.4	11388.5	11399.1	11307.6	11314.7	11315.7	11363.2	11344.1	11510.2	11610.5	11696.4	11882.7	11965.3	12182.6	12312.6	12549.7	12760.3	12984.8
mpDHFR 5	18151.8	17958.9	18057.2	17649.6	17612.9	17626.3	17429.5	17223.6	16879.9	17035.5	16592	16688.6	16287.1	16409	16296.7	15971.8	15950.2	15786.4	15676.5	15544.2	15410.6	15245.2	14987.3	14991.4	14835.5	14706.9	14579.2	14461.6	14210.2	14409.7	14223.6	14259.7	14160.9	13946.9	14182.1	14089.4	14253.8	14267.3	14432.9	14644.9	14812.9	14914	15111.1	15249.3	15460.2	15748.3	15999.1	16464	16790
mpDHFR 6	16247.7	16280.4	15943.3	15821.3	15653.5	15435	15234.2	14927.1	14739.7	14557.3	14468.4	14104.7	14034.8	13710.8	13436.1	13405.6	12896.5	12947.8	12767.6	12559.8	12335.9	12314.9	12229	12140.5	12089.3	12036.1	11796.8	11941	11882.1	11991.2	11940.8	12055.8	12148	12077.3	12389	12455.4	12583.5	12701.4	12806.8	12859.6	13009.6	13130.1	13091.3	13309.4	13238.1	13377.5	13511.4	13478.9	13449.9
mpDHFR 7	14594.7	14491.6	14253.3	14025.6	13809	13571.5	13357.2	13180.7	12941.8	12747.2	12473.8	12356.6	12090.4	11893.5	11714.7	11529.2	11281	11124.6	10941.8	10744.5	10641.8	10575.4	10478.9	10324.4	10270.5	10197.2	10160.5	10151.5	10122.8	10056	10027.7	10066	10108.1	10124.9	10254.3	10221	10287.4	10345.5	10468.6	10555.8	10598.4	10739.6	10838.8	10925	10979.8	11043.6	11155.2	11220.8	11330
mpDHFR 8	25164.5	24376.8	23995.4	23740	23309.9	23020.2	22197.2	22231.8	21667.2	21588.1	20820.9	20745.7	19969.2	20149.8	19704.1	18970.4	19138.2	18858.2	18467.7	18177.2	17910.8	17785.1	17438.8	17394.1	17137.4	16862.6	16687.2	16539.6	16289.8	15998	15708.5	15464.3	15430.5	15346.8	15427.9	15130.8	15145	15385.7	15326.6	15380.1	15360.7	15400.7	15461.1	15392	15421.9	15430.3	15333.8	15234.9	15177.9
mpDHFR 9	21827	21473	21235.6	20711.2	20384.9	20014.6	19540.4	19248.5	18885.1	18563	18130.8	17927.7	17446.7	17165.3	16827.5	16456.8	16157.5	15869.7	15557.5	15301.4	15071	14839.3	14491.2	14298.5	14024	13762.1	13490.4	13346.1	13145.6	13111.7	12988.3	12877.6	12878.8	12798.5	12792.2	12773.8	12792.9	12775.2	12712.3	12767.7	12804.8	12835.5	12849.6	12998.7	12944.2	13031.5	13066.4	12998.4	12951.5
mpDHFR 10	23360.3	22937.2	22405	21921.5	21445.2	21116.8	20701	20368.9	20015.9	19508	19185.4	18833.7	18439.9	18064.3	17678.8	17457.5	17119.6	16796.5	16423.4	16160.9	15906.2	15665.1	15391	14971.4	14747.1	14492	14176.1	13876.9	13693.6	13593.9	13500.5	13389.9	13330.8	13316.4	13209.8	13250.5	13234.5	13192.3	13203.9	13249.2	13223.6	13262	13421.3	13444.7	13308.1	13364.8	13289.6	13266.2	13158.1
mpDHFR 11	22345.7	22084.2	21836.4	21485	21175.4	20927	20538.1	20260.2	19952.9	19706.3	19346.4	19108.1	18900.3	18624.6	18445.6	18148.9	17942.3	17827.6	17615.4	17497.2	17301.3	17230.1	16894.5	16796.1	16638.3	16446.8	16325.6	16273.7	16029.4	16133	16043.6	16052.5	16029.3	15999.7	16033.9	16088.2	16222.3	16319.4	16289.7	16333.1	16528.2	16565.5	16708.5	16789.8	16781.1	16931.1	16919.1	17055.2	16982.4
mpDHFR 12	20585.1	19987.5	19829.4	19461.1	19001.2	18882	18586	18340.8	18166	17923.9	17657.4	17236.1	17061.1	16787.8	16587.9	16405.4	16015.6	16009.3	15875.6	15659.1	15224.1	15311.8	14970.7	14825	14520.8	14266.3	14075	13744.8	13709.6	13530.9	13620.4	13447.9	13437.6	13282.8	13384.5	13432.5	13258	13198.1	13182.1	13539.7	13372.3	13547.8	13526.7	13638.9	13684.6	13670	13730.8	13816	13589
chimera 1	1.25491e+06	1.26828e+06	1.26887e+06	1269910	1272400	1270006	1.26668e+06	1262773	1.25821e+06	1253814	1.25145e+06	1.24538e+06	1242092	1238565	1.2325e+06	1225311	1.22013e+06	1213543	1.20657e+06	1200967	1.19619e+06	1.18867e+06	1182189	1.17383e+06	1.16831e+06	1.16257e+06	1156476	1.1531e+06	1.14478e+06	1140678	1.12677e+06	1.11672e+06	1098768	1.0814e+06	1.06224e+06	1.04169e+06	1.01916e+06	994151	972755	948731	929588	908664	888169	868485	848204	832545	815797	799632	790183
chimera 2	1.32516e+06	1.31256e+06	1.31355e+06	1.31076e+06	1.30933e+06	1302140	1.29433e+06	1.28956e+06	1.28032e+06	1271474	1.26401e+06	1.25519e+06	1.24536e+06	1.23661e+06	1.22773e+06	1.22023e+06	1.21385e+06	1.20605e+06	1.19427e+06	1.18435e+06	1.17721e+06	1.17164e+06	1.16256e+06	1.15774e+06	1151126	1.14104e+06	1.1345e+06	1.12376e+06	1.11529e+06	1.09776e+06	1.07353e+06	1.05626e+06	1026197	1.00465e+06	974120	946603	923159	898220	882687	871285	857293	850615	838589	830151	820446	808274	800156	784340	776045
chimera 3	1.51549e+06	1.52938e+06	1.53804e+06	1.54042e+06	1544185	1.54155e+06	1.54105e+06	1536669	1.53361e+06	1.52983e+06	1526237	1521217	1.51672e+06	1.51488e+06	1509441	1504903	1.49925e+06	1.49448e+06	1.48822e+06	1482532	1.47725e+06	1.46995e+06	1.46289e+06	1.45607e+06	1.44733e+06	1.43866e+06	1.42933e+06	1.41955e+06	1409082	1397885	1.38404e+06	1.36818e+06	1.35044e+06	1.33099e+06	1.30932e+06	1.28606e+06	1.26221e+06	1.23445e+06	1.2057e+06	1.17708e+06	1154624	1.13146e+06	1.11152e+06	1091299	1068914	1.04908e+06	1.02874e+06	1.01048e+06	993419
chimera 4	1.32482e+06	1338100	1.34685e+06	1.35092e+06	1.35403e+06	1.355e+06	1357445	1.35802e+06	1.35795e+06	1351391	1.34815e+06	1345488	1.34154e+06	1.33513e+06	1.32933e+06	1322114	1317490	1.30731e+06	1.30492e+06	1.29369e+06	1281859	1.27638e+06	1.26655e+06	1.25881e+06	1249701	1.24201e+06	1.23408e+06	1.22376e+06	1.21503e+06	1.20107e+06	1.18417e+06	1.16501e+06	1.14708e+06	1125059	1.10207e+06	1.07724e+06	1.04995e+06	1.0231e+06	996416	972468	948463	926492	904599	886724	868470	853092	838258	824673	812685
chimera 5	1.14262e+06	1.16877e+06	1.1811e+06	1185651	1.19104e+06	1.1941e+06	1.1988e+06	1.19917e+06	1.20097e+06	1.19717e+06	1.19707e+06	1.19704e+06	1.19483e+06	1.19271e+06	1.18906e+06	1.18586e+06	1.18484e+06	1.17952e+06	1.17669e+06	1.16975e+06	1.16452e+06	1.16022e+06	1.15157e+06	1.15007e+06	1.14394e+06	1138238	1.13024e+06	1.12779e+06	1120429	1.11139e+06	1104465	1.09658e+06	1.09225e+06	1080523	1068579	1.05321e+06	1.04063e+06	1.02915e+06	1.00708e+06	989435	972457	956392	937607	927752	911700	895480	880758	868248	851682
chimera 6	1.1844e+06	1197030	1.20713e+06	1211524	1.2185e+06	1.22051e+06	1.22422e+06	1.22431e+06	1.22765e+06	1.22578e+06	1.22665e+06	1.22877e+06	1.22513e+06	1.22526e+06	1222364	1.21755e+06	1.21792e+06	1.21303e+06	1.20974e+06	1207139	1.20215e+06	1.20113e+06	1.19583e+06	1.19204e+06	1.18856e+06	1.18277e+06	1176934	1.16892e+06	1.16259e+06	1.15114e+06	1.14727e+06	1.13418e+06	1127530	1.11209e+06	1100314	1.08244e+06	1.0685e+06	1.05609e+06	1.03502e+06	1.02165e+06	1.00035e+06	980689	964244	942121	923169	908962	889175	875808	857997
eGFP 1	4145280	4143501	4.14695e+06	4151682	4.14679e+06	4.15899e+06	4156244	4.15649e+06	4154596	4156675	4.15516e+06	4149096	4.14469e+06	4149642	4138956	4134791	4135153	4.13724e+06	4129201	4123925	4.1215e+06	4116856	4114192	4.11678e+06	4.103e+06	4099383	4.10054e+06	4.09145e+06	4.0866e+06	4079499	4.0898e+06	4085311	4075590	4.06978e+06	4072423	4058400	4062330	4059246	4.05511e+06	4044519	4.04623e+06	4.03993e+06	4035102	4.0248e+06	4.01628e+06	4.01072e+06	4.01415e+06	4004573	3.99905e+06
eGFP 2	4.11049e+06	4129932	4129141	4.12632e+06	4133910	4.12897e+06	4.1344e+06	4.12779e+06	4137198	4118992	4.12951e+06	4.11634e+06	4119546	4.11166e+06	4.11517e+06	4.11378e+06	4.11843e+06	4.09525e+06	4.10439e+06	4095299	4094462	4.08467e+06	4088036	4.07654e+06	4077152	4071919	4.0596e+06	4.06206e+06	4.05581e+06	4051183	4.05387e+06	4.04888e+06	4.0422e+06	4.03721e+06	4.03108e+06	4025095	4028024	4.02181e+06	4.02171e+06	4010104	4010266	4.00271e+06	3997965	3.99474e+06	3.98599e+06	3.98198e+06	3.97646e+06	3.96665e+06	3.9635e+06
eGFP 3	4.07404e+06	4087937	4098864	4.10376e+06	4.10938e+06	4.11042e+06	4.11362e+06	4.11389e+06	4.11698e+06	4.11644e+06	4.11946e+06	4.11533e+06	4.11522e+06	4.11379e+06	4.11548e+06	4.11394e+06	4.11331e+06	4111618	4109873	4.10705e+06	4.10641e+06	4102043	4.09886e+06	4098992	4.09403e+06	4.09051e+06	4.09167e+06	4082793	4.08003e+06	4.07535e+06	4074365	4.07226e+06	4.06882e+06	4.06111e+06	4058474	4053978	4.05167e+06	4.0461e+06	4.04342e+06	4.03735e+06	4036634	4029037	4027209	4.01989e+06	4.0163e+06	4010932	4.00729e+06	4.00014e+06	3997073
eGFP 4	4231069	4236862	4242943	4247704	4251962	4248319	4258184	4258682	4253539	4255922	4257693	4259700	4256240	4253129	4254869	4258108	4.25281e+06	4.25172e+06	4.24969e+06	4246270	4245534	4245587	4243737	4243575	4.23958e+06	4236957	4239076	4235905	4233152	4.2304e+06	4.23081e+06	4.23e+06	4222003	4221950	4216910	4213851	4218267	4210748	4209579	4208907	4.20546e+06	4.19788e+06	4199671	4.19243e+06	4.18813e+06	4.18627e+06	4.1825e+06	4.18291e+06	4.18002e+06
eGFP 5	4.12331e+06	4.13194e+06	4136954	4.13792e+06	4.14028e+06	4.14126e+06	4138125	4.13833e+06	4.13981e+06	4.13709e+06	4.13848e+06	4.13467e+06	4134845	4.12844e+06	4129267	4128129	4.12913e+06	4124014	4.12433e+06	4.12395e+06	4.11881e+06	4117441	4.11523e+06	4.11289e+06	4.10906e+06	4109821	4.10639e+06	4.10645e+06	4.10247e+06	4101416	4098208	4.09745e+06	4.09257e+06	4086218	4086100	4.08097e+06	4082246	4.07379e+06	4071481	4.06866e+06	4.06525e+06	4063772	4.05906e+06	4056178	4.05154e+06	4.04895e+06	4048892	4.04254e+06	4039298
eGFP 6	3.72641e+06	3741275	3.74807e+06	3.75191e+06	3.75174e+06	3755906	3756287	3.75387e+06	3.75413e+06	3.75247e+06	3.74705e+06	3.74887e+06	3746032	3.74364e+06	3.74024e+06	3.73722e+06	3.73306e+06	3.73515e+06	3731873	3.72762e+06	3723496	3.71764e+06	3716915	3715134	3.71141e+06	3.71184e+06	3.70736e+06	3.70514e+06	3701328	3699478	3.69614e+06	3694580	3.68976e+06	3.68581e+06	3.68508e+06	3677556	3.6749e+06	3.6737e+06	3667956	3.66604e+06	3.66251e+06	3660130	3.65428e+06	3651738	3.64767e+06	3.64065e+06	3634863	3634761	3.63173e+06
[truncated: 124 more columns]
