# Supplementary material for: Measuring protein stability in the GroEL chaperonin cage reveals massive destabilization
Source: eLife. 2020 Jul 27;9:e56511. doi: 10.7554/eLife.56511 (PMC7440923; doi:10.7554/eLife.56511)
Supplement: Figure 3—source data 1. [file elife-56511-fig3-data1.xlsx]

## Sheet: Sheet1
time (sec)	0	50	100	150	200	250	300	350	400	450	500	550	600	650	700	750	800	850	900	950	1000	1050	1100	1150	1200	1250	1300	1350	1400	1450	1500	1550	1600	1650	1700	1750	1800	1850	1900	1950	2000	2050	2100	2150	2200	2250	2300	2350	2400
Free chimera	1.802	1.7898	1.7852	1.7722	1.7622	1.7519	1.7387	1.7263	1.711	1.6976	1.6848	1.674	1.6608	1.6492	1.6367	1.6244	1.6121	1.5988	1.586	1.5749	1.561	1.5482	1.5343	1.5228	1.5083	1.498	1.4838	1.4717	1.4608	1.4474	1.4355	1.4242	1.4126	1.401	1.3897	1.3796	1.3676	1.3566	1.3472	1.3364	1.3272	1.3165	1.3077	1.2982	1.2887	1.2796	1.2711	1.2623	1.2544
Caged chimera	1.8175	1.8147	1.8145	1.8144	1.8114	1.8096	1.8072	1.8048	1.8009	1.7978	1.7929	1.7891	1.785	1.7799	1.7745	1.769	1.7652	1.7596	1.754	1.7475	1.7419	1.7357	1.7294	1.7234	1.716	1.7104	1.7037	1.6962	1.689	1.683	1.6757	1.6693	1.6619	1.6537	1.6477	1.6414	1.633	1.6254	1.6165	1.6098	1.6025	1.596	1.5899	1.581	1.5734	1.5664	1.5581	1.5503	1.5429
[truncated: 233 more columns]
