# Supplementary material for: Measuring protein stability in the GroEL chaperonin cage reveals massive destabilization
Source: eLife. 2020 Jul 27;9:e56511. doi: 10.7554/eLife.56511 (PMC7440923; doi:10.7554/eLife.56511)
Supplement: Figure 4—figure supplement 1—source data 1. [file elife-56511-fig4-figsupp1-data1.xlsx]

## Sheet: Sheet1
	Temperature [oC]	4	4.5	5	5.5	6	6.5	7	7.5	8	8.5	9	9.5	10	10.5	11	11.5	12	12.5	13	13.5	14	14.5	15	15.5	16	16.5	17	17.5	18	18.5	19	19.5	20	20.5	21	21.5	22	22.5	23	23.5	24	24.5	25	25.5	26	26.5	27	27.5
	chimera 1	1.25491e+06	1.26828e+06	1.26887e+06	1269910	1272400	1270006	1.26668e+06	1262773	1.25821e+06	1253814	1.25145e+06	1.24538e+06	1242092	1238565	1.2325e+06	1225311	1.22013e+06	1213543	1.20657e+06	1200967	1.19619e+06	1.18867e+06	1182189	1.17383e+06	1.16831e+06	1.16257e+06	1156476	1.1531e+06	1.14478e+06	1140678	1.12677e+06	1.11672e+06	1098768	1.0814e+06	1.06224e+06	1.04169e+06	1.01916e+06	994151	972755	948731	929588	908664	888169	868485	848204	832545	815797	799632
	chimera 2	1.32516e+06	1.31256e+06	1.31355e+06	1.31076e+06	1.30933e+06	1302140	1.29433e+06	1.28956e+06	1.28032e+06	1271474	1.26401e+06	1.25519e+06	1.24536e+06	1.23661e+06	1.22773e+06	1.22023e+06	1.21385e+06	1.20605e+06	1.19427e+06	1.18435e+06	1.17721e+06	1.17164e+06	1.16256e+06	1.15774e+06	1151126	1.14104e+06	1.1345e+06	1.12376e+06	1.11529e+06	1.09776e+06	1.07353e+06	1.05626e+06	1026197	1.00465e+06	974120	946603	923159	898220	882687	871285	857293	850615	838589	830151	820446	808274	800156	784340
	chimera 3	1.51549e+06	1.52938e+06	1.53804e+06	1.54042e+06	1544185	1.54155e+06	1.54105e+06	1536669	1.53361e+06	1.52983e+06	1526237	1521217	1.51672e+06	1.51488e+06	1509441	1504903	1.49925e+06	1.49448e+06	1.48822e+06	1482532	1.47725e+06	1.46995e+06	1.46289e+06	1.45607e+06	1.44733e+06	1.43866e+06	1.42933e+06	1.41955e+06	1409082	1397885	1.38404e+06	1.36818e+06	1.35044e+06	1.33099e+06	1.30932e+06	1.28606e+06	1.26221e+06	1.23445e+06	1.2057e+06	1.17708e+06	1154624	1.13146e+06	1.11152e+06	1091299	1068914	1.04908e+06	1.02874e+06	1.01048e+06
	chimera 4	1.32482e+06	1338100	1.34685e+06	1.35092e+06	1.35403e+06	1.355e+06	1357445	1.35802e+06	1.35795e+06	1351391	1.34815e+06	1345488	1.34154e+06	1.33513e+06	1.32933e+06	1322114	1317490	1.30731e+06	1.30492e+06	1.29369e+06	1281859	1.27638e+06	1.26655e+06	1.25881e+06	1249701	1.24201e+06	1.23408e+06	1.22376e+06	1.21503e+06	1.20107e+06	1.18417e+06	1.16501e+06	1.14708e+06	1125059	1.10207e+06	1.07724e+06	1.04995e+06	1.0231e+06	996416	972468	948463	926492	904599	886724	868470	853092	838258	824673
	chimera 5	1.14262e+06	1.16877e+06	1.1811e+06	1185651	1.19104e+06	1.1941e+06	1.1988e+06	1.19917e+06	1.20097e+06	1.19717e+06	1.19707e+06	1.19704e+06	1.19483e+06	1.19271e+06	1.18906e+06	1.18586e+06	1.18484e+06	1.17952e+06	1.17669e+06	1.16975e+06	1.16452e+06	1.16022e+06	1.15157e+06	1.15007e+06	1.14394e+06	1138238	1.13024e+06	1.12779e+06	1120429	1.11139e+06	1104465	1.09658e+06	1.09225e+06	1080523	1068579	1.05321e+06	1.04063e+06	1.02915e+06	1.00708e+06	989435	972457	956392	937607	927752	911700	895480	880758	868248
	chimera 6	1.1844e+06	1197030	1.20713e+06	1211524	1.2185e+06	1.22051e+06	1.22422e+06	1.22431e+06	1.22765e+06	1.22578e+06	1.22665e+06	1.22877e+06	1.22513e+06	1.22526e+06	1222364	1.21755e+06	1.21792e+06	1.21303e+06	1.20974e+06	1207139	1.20215e+06	1.20113e+06	1.19583e+06	1.19204e+06	1.18856e+06	1.18277e+06	1176934	1.16892e+06	1.16259e+06	1.15114e+06	1.14727e+06	1.13418e+06	1127530	1.11209e+06	1100314	1.08244e+06	1.0685e+06	1.05609e+06	1.03502e+06	1.02165e+06	1.00035e+06	980689	964244	942121	923169	908962	889175	875808
	Temperature [oC]	4	4.5	5	5.5	6	6.5	7	7.5	8	8.5	9	9.5	10	10.5	11	11.5	12	12.5	13	13.5	14	14.5	15	15.5	16	16.5	17	17.5	18	18.5	19	19.5	20	20.5	21	21.5	22	22.5	23	23.5	24	24.5	25	25.5	26	26.5	27	27.5
1 chimera +	NADPH	2.89447e+06	2.89138e+06	2886231	2.88336e+06	2881724	2.87589e+06	2.87131e+06	2.86845e+06	2862632	2856789	2851424	2.84654e+06	2.84218e+06	2.83654e+06	2831637	2825756	2819424	2814041	2.80947e+06	2.80178e+06	2797624	2791825	2.78433e+06	2776561	2773169	2764238	2.76006e+06	2790080	2783438	2.7737e+06	2.76806e+06	2.76192e+06	2755169	2747370	2740931	2.73545e+06	2.7277e+06	2719285	2.71386e+06	2.70485e+06	2699333	2.69181e+06	2.68366e+06	2676647	2670992	2.66182e+06	2643623	2613911
2 chimera +	NADPH	2967588	2.96849e+06	2.97073e+06	2.97252e+06	2971660	2.97426e+06	2.9708e+06	2.96799e+06	2.96526e+06	2.96717e+06	2961337	2.95706e+06	2.9548e+06	2.9474e+06	2.94359e+06	2.93954e+06	2.93807e+06	2933215	2927895	2.92353e+06	2.91982e+06	2.91453e+06	2.91043e+06	2.90312e+06	2.89518e+06	2.89223e+06	2.88558e+06	2.88066e+06	2873838	2.86775e+06	2860685	2.85314e+06	2.848e+06	2840139	2836486	2.83013e+06	2.82101e+06	2.81708e+06	2806515	2.80021e+06	2.79178e+06	2.78507e+06	2.77374e+06	2.76352e+06	2.74866e+06	2.73742e+06	2.71104e+06	2.69022e+06
3 chimera +	NADPH	3329567	3.33159e+06	3.3315e+06	3.33106e+06	3330864	3328346	3.32683e+06	3.32356e+06	3.3213e+06	3.31574e+06	3312450	3.30962e+06	3303692	3298925	3.29249e+06	3287112	3283007	3.27745e+06	3270718	3264961	3.25972e+06	3254263	3.24661e+06	3.2411e+06	3.23537e+06	3.22912e+06	3222331	3.21762e+06	3.2116e+06	3.20565e+06	3.19953e+06	3191450	3.18535e+06	3180189	3.17317e+06	3.16615e+06	3.15851e+06	3151239	3.14402e+06	3.13674e+06	3.12777e+06	3.11192e+06	3.10131e+06	3064269	3038254	2.99533e+06	2959044	2.91525e+06
4 chimera +	NADPH	3534206	3.53831e+06	3.53892e+06	3537622	3539598	3.53522e+06	3.5349e+06	3531029	3527416	3.52356e+06	3519033	3.51454e+06	3510567	3508409	3501573	3.49599e+06	3.4915e+06	3485189	3.47732e+06	3.47238e+06	3.46705e+06	3.45916e+06	3.45372e+06	3.44982e+06	3.44064e+06	3434419	3.43692e+06	3420527	3411388	3405430	3397527	3390849	3380507	3373301	3366193	3.3598e+06	3.35131e+06	3342411	3335714	3.31516e+06	3299440	3.28095e+06	3.2708e+06	3.2495e+06	3.22103e+06	3.19381e+06	3.15416e+06	3.11371e+06
5 chimera +	NADPH	3436420	3441830	3441958	3.44146e+06	3.43772e+06	3.41645e+06	3421377	3.41226e+06	3430231	3409428	3404382	3.4181e+06	3.41318e+06	3395696	3385663	3.3846e+06	3386001	3385648	3.37139e+06	3.35711e+06	3.3559e+06	3.34636e+06	3349209	3.33972e+06	3.32524e+06	3.33693e+06	3.31633e+06	3.30013e+06	3.29868e+06	3.28741e+06	3281775	3280778	3.26674e+06	3.26132e+06	3255639	3251656	3.23688e+06	3.24287e+06	3.22244e+06	3.20437e+06	3.19534e+06	3182455	3.17961e+06	3167639	3.15196e+06	3.13756e+06	3.11777e+06	3.0917e+06
6 chimera +	NADPH	3.3368e+06	3.33744e+06	3.34046e+06	3.34247e+06	3344853	3.34545e+06	3.34305e+06	3.33998e+06	3339303	3.33493e+06	3.33436e+06	3.33252e+06	3324091	3.32303e+06	3.3191e+06	3.31439e+06	3.30863e+06	3293817	3288139	3273156	3266779	3.25078e+06	3246648	3.2383e+06	3.22541e+06	3216682	3.20451e+06	3197957	3190167	3184544	3179541	3171337	3.16376e+06	3157397	3.14185e+06	3.13889e+06	3.13478e+06	3128336	3.11844e+06	3.11468e+06	3.10618e+06	3098532	3.09132e+06	3081922	3071701	3065103	3.058e+06	3.04925e+06
	Temperature [oC]	4	4.5	5	5.5	6	6.5	7	7.5	8	8.5	9	9.5	10	10.5	11	11.5	12	12.5	13	13.5	14	14.5	15	15.5	16	16.5	17	17.5	18	18.5	19	19.5	20	20.5	21	21.5	22	22.5	23	23.5	24	24.5	25	25.5	26	26.5	27	27.5
1 chimera +	DHF	3065647	3072538	3076316	3.07436e+06	3061884	3.06809e+06	3.05666e+06	3.05137e+06	3.0452e+06	3.04833e+06	3.03379e+06	3035971	3030709	3.01671e+06	3012882	3006082	2.99836e+06	2990705	2985240	2981523	2.97012e+06	2.95852e+06	2951220	2.94844e+06	2.94259e+06	2934276	2926114	2.91836e+06	2.91573e+06	2.90297e+06	2.8909e+06	2.87895e+06	2.87279e+06	2861425	2.85188e+06	2.84416e+06	2830495	2.82077e+06	2813722	2.8004e+06	2789550	2782003	2.7783e+06	2.76209e+06	2753596	2742909	2.73506e+06	2.72608e+06
2 chimera +	DHF	3.01363e+06	3.01631e+06	3.01725e+06	3016682	3.01844e+06	3.01684e+06	3.01751e+06	3.01384e+06	3012234	3.00912e+06	3.00577e+06	3.0025e+06	2999878	2.9962e+06	2.99239e+06	2.98854e+06	2.98506e+06	2.97921e+06	2.97613e+06	2969195	2.96799e+06	2.95867e+06	2.95551e+06	2.95045e+06	2.94359e+06	2937529	2.93011e+06	2.92337e+06	2915775	2908274	2.90195e+06	2.89449e+06	2.88762e+06	2.88021e+06	2.8723e+06	2864910	2.85743e+06	2849742	2.84291e+06	2.83351e+06	2826533	2.81624e+06	2808605	2.80168e+06	2795420	2.78571e+06	2778984	2.77041e+06
3 chimera +	DHF	2.9402e+06	2.9435e+06	2944248	2.94366e+06	2.94296e+06	2.93998e+06	2.93523e+06	2933055	2.92984e+06	2.92305e+06	2.91837e+06	2.91552e+06	2.91022e+06	2902398	2.89641e+06	2.88919e+06	2884868	2.87987e+06	2.87366e+06	2.86496e+06	2.85924e+06	2853654	2.8457e+06	2840784	2.83265e+06	2.8266e+06	2.81872e+06	2.81211e+06	2.80431e+06	2.79742e+06	2.78842e+06	2780154	2.77346e+06	2.76458e+06	2.75617e+06	2750753	2.74148e+06	2732880	2.72606e+06	2.71531e+06	2706777	2.69809e+06	2688190	2.67792e+06	2671945	2660152	2650687	2.64106e+06
4 chimera +	DHF	3071400	3.06768e+06	3069192	3066898	3.06165e+06	3.06245e+06	3.06093e+06	3.05736e+06	3054096	3050381	3.04559e+06	3042010	3037405	3.03096e+06	3.02542e+06	3020690	3.016e+06	3.01212e+06	3.00599e+06	3.00027e+06	2996471	2.9894e+06	2.98476e+06	2.97868e+06	2.97145e+06	2.96507e+06	2958395	2952074	2945622	2.93827e+06	2931109	2.92382e+06	2.91695e+06	2908611	2900240	2894066	2.88409e+06	2.87678e+06	2.86974e+06	2.85982e+06	2850087	2.84211e+06	2830494	2.82293e+06	2814887	2.80368e+06	2.79486e+06	2.78368e+06
5 chimera +	DHF	2.99784e+06	2.99162e+06	2.99079e+06	2983591	2.98247e+06	2.97572e+06	2.96924e+06	2.96535e+06	2.95707e+06	2.94928e+06	2.94568e+06	2.9363e+06	2.93225e+06	2.92356e+06	2916436	2909097	2.9042e+06	2.89781e+06	2888405	2.88248e+06	2872566	2.86792e+06	2860380	2.85235e+06	2.84458e+06	2837330	2.83549e+06	2.81741e+06	2.8091e+06	2.80937e+06	2.79374e+06	2.78444e+06	2775766	2.76865e+06	2.76047e+06	2.75152e+06	2.74468e+06	2.73722e+06	2.72646e+06	2718306	2.70739e+06	2.699e+06	2.68957e+06	2.68056e+06	2681927	2.66301e+06	2653695	2640965
6 chimera +	DHF	2.90198e+06	2.90241e+06	2898371	2.89541e+06	2893148	2.88914e+06	2.8836e+06	2879559	2.87559e+06	2869464	2.8668e+06	2.86345e+06	2.85632e+06	2.85069e+06	2.84408e+06	2.84184e+06	2.83438e+06	2827250	2822097	2816138	2.80762e+06	2.80166e+06	2.79407e+06	2.78866e+06	2.77978e+06	2.77433e+06	2766943	2.75524e+06	2749236	2741450	2.73355e+06	2.72641e+06	2.71756e+06	2709018	2704795	2693221	2.68301e+06	2.67355e+06	2666260	2.65662e+06	2644544	2.63696e+06	2.62517e+06	2618026	2.60806e+06	2596918	2590891	2.5827e+06
[truncated: 134 more columns]
