# Supplementary material for: Measuring protein stability in the GroEL chaperonin cage reveals massive destabilization
Source: eLife. 2020 Jul 27;9:e56511. doi: 10.7554/eLife.56511 (PMC7440923; doi:10.7554/eLife.56511)
Supplement: Figure 4—figure supplement 2—source data 1. [file elife-56511-fig4-figsupp2-data1.xlsx]

## Sheet: Sheet1
	ΔG (cal/mol)		error	[NADPH] uM	RTln(1+[S]/Km) (kcal/mol)
	-3886.1		275	14.454	0.44854
	-4074.3		267	14.454	0.44854
	-3490.5		158	2.8908	0.12047
	-3580.7		190	0.0504	0.0023217
	-3454.5		258	0.01296	0.00059786
	-5686.5		391	180	1.6186
	-5267.5		436	144.54	1.4968
	-5042.8		139	54	0.98385
