# Supplementary material for: Measuring protein stability in the GroEL chaperonin cage reveals massive destabilization
Source: eLife. 2020 Jul 27;9:e56511. doi: 10.7554/eLife.56511 (PMC7440923; doi:10.7554/eLife.56511)
Supplement: Figure 4—source data 1. [file elife-56511-fig4-data1.xlsx]

## Sheet: Sheet1
Caged chimera
time (sec)	0	44.9	89.9	134.9	179.9	224.9	269.9	314.9	359.9	404.9	449.9	494.9	539.9	584.9	629.9	674.9	719.9	764.9	809.9	854.9	899.9	944.9	989.9	1034.9	1079.9	1124.9	1169.9	1214.9	1259.9	1304.9	1349.9	1394.9	1439.9	1484.9	1529.9	1574.9	1619.9	1664.9	1709.9	1754.9	1799.9	1844.9	1889.9	1934.9	1979.9	2024.9	2069.9	2114.9	2159.9
DHF (uM)
275		1.9118	1.9107	1.9072	1.9035	1.9007	1.899	1.8943	1.8907	1.8871	1.8821	1.8767	1.8736	1.8676	1.8628	1.856	1.851	1.8438	1.8382	1.8318	1.8256	1.818	1.8121	1.8048	1.7972	1.7903	1.7839	1.7754	1.7672	1.7615	1.7528	1.7463	1.7383	1.7282	1.7205	1.7149	1.7043	1.6965	1.6873	1.68	1.6715	1.6645	1.6549	1.6473	1.6388	1.6311	1.6221	1.6146	1.6054
250	1.8175	1.8167	1.8165	1.8144	1.8114	1.8096	1.8072	1.8048	1.8009	1.7978	1.7929	1.7891	1.785	1.7799	1.7745	1.769	1.7652	1.7596	1.754	1.7475	1.7419	1.7357	1.7294	1.7234	1.716	1.7104	1.7037	1.6962	1.689	1.683	1.6757	1.6693	1.6619	1.6537	1.6477	1.6414	1.633	1.6254	1.6165	1.6098	1.6025	1.596	1.5899	1.581	1.5734	1.5664	1.5581	1.5503	1.5429
225		1.7575	1.7569	1.756	1.7546	1.7519	1.748	1.7448	1.742	1.7381	1.7334	1.7289	1.7263	1.7203	1.7155	1.7093	1.7058	1.6998	1.694	1.6883	1.6828	1.6755	1.6702	1.6638	1.6577	1.6516	1.6446	1.6372	1.6313	1.6255	1.6183	1.6102	1.6039	1.5963	1.5894	1.5822	1.5743	1.5669	1.5592	1.5523	1.5448	1.5365	1.5303	1.5217	1.5156	1.5083	1.5014	1.4938	1.4868
200		1.7718	1.7714	1.7711	1.7702	1.7679	1.7653	1.7624	1.7599	1.7561	1.7525	1.7464	1.7419	1.7368	1.7332	1.7262	1.7215	1.7159	1.7107	1.7052	1.6997	1.6922	1.6879	1.6811	1.6745	1.6682	1.6626	1.6555	1.6471	1.6414	1.6359	1.628	1.6211	1.6144	1.6084	1.6003	1.5932	1.5868	1.5794	1.5722	1.5648	1.5593	1.5515	1.5445	1.538
175		1.6034	1.6026	1.6004	1.5955	1.5921	1.5883	1.5844	1.5805	1.5772	1.573	1.5684	1.5656	1.5603	1.5558	1.5505	1.546	1.5412	1.5358	1.5299	1.525	1.5186	1.5145	1.5083	1.5022	1.4969	1.4912	1.485	1.4784	1.4731	1.4669	1.4608	1.4548	1.4484	1.4421	1.4363	1.4295	1.4239	1.4168	1.411	1.4045	1.3994	1.3932	1.3871	1.381	1.3748	1.3692	1.363	1.3576
150		1.662	1.6604	1.6588	1.6571	1.6548	1.6524	1.6491	1.6456	1.6426	1.6391	1.6349	1.6323	1.6278	1.6232	1.6176	1.6146	1.6096	1.6047	1.5996	1.594	1.5881	1.5834	1.5783	1.5735	1.5676	1.5618	1.5561	1.5498	1.5442	1.5387	1.533	1.5279	1.5211	1.5148	1.5096	1.5033	1.4976	1.4908	1.4859	1.4794	1.4742	1.4687	1.4627	1.4574	1.4516	1.4455	1.4396	1.4345
125				1.5697	1.5679	1.566	1.5627	1.5607	1.5577	1.5549	1.5518	1.5477	1.545	1.5408	1.5369	1.5319	1.5287	1.5244	1.5198	1.5157	1.5107	1.5054	1.501	1.4966	1.4923	1.4867	1.4817	1.4771	1.4714	1.4665	1.4617	1.4567	1.4513	1.4462	1.4407	1.4367	1.4309	1.4264	1.4207	1.4161	1.4105	1.4066
100		1.4776	1.477	1.4736	1.4716	1.4698	1.4668	1.4636	1.4611	1.4583	1.4557	1.4519	1.4493	1.4454	1.4427	1.4377	1.4348	1.4309	1.4266	1.4226	1.4188	1.4135	1.4105	1.4058	1.4018	1.3977	1.3934	1.3882	1.3833	1.379	1.3756	1.3709	1.3666	1.3621	1.3572	1.3535	1.3487	1.3444	1.3393	1.3356	1.3311	1.3278	1.3236	1.3189	1.3153	1.3109	1.3068	1.303	1.2996
50		1.4204	1.4209	1.4192	1.417	1.4149	1.4121	1.41	1.4085	1.4058	1.4036	1.4006	1.3989	1.3965	1.3936	1.3901	1.3879	1.3858	1.383	1.3797	1.3771	1.3732	1.3706	1.3679	1.3659	1.3628	1.3613	1.3566	1.353	1.3502	1.3479	1.3454	1.3423	1.3392	1.3363	1.334	1.331	1.3284	1.3253	1.3232	1.3203
25		1.3964	1.3957	1.3934	1.3917	1.3915	1.3887	1.3871	1.3855	1.3836	1.3814	1.3797	1.3778	1.3762	1.3738	1.3712	1.3697	1.367	1.3649	1.3622	1.3603	1.358	1.3565	1.3544	1.3524	1.3505	1.3479	1.3453	1.3431	1.3409	1.3395	1.337	1.335	1.3329
[truncated: 11 more columns]
