# Supplementary material for: Measuring protein stability in the GroEL chaperonin cage reveals massive destabilization
Source: eLife. 2020 Jul 27;9:e56511. doi: 10.7554/eLife.56511 (PMC7440923; doi:10.7554/eLife.56511)
Supplement: Figure 4—source data 2. [file elife-56511-fig4-data2.xlsx]

## Sheet: Sheet1
Free chimera
No#	1	2	3	4	5	6	7	8	9	10	11	12	13	14	15	16	17	18
time (sec)	0	23	45.9	68.9	91.9	114.9	137.9	160.9	183.8	206.8	229.8	252.8	275.7	298.7	321.7	344.7	367.6	390.6
DHF (uM)
175				1.3482	1.3424	1.343	1.33695	1.3365	1.3302	1.32775	1.32315	1.3182
135				1.2502	1.24735	1.2456	1.2428	1.2425	1.23625	1.23415
105					1.132	1.12905	1.1271	1.1248	1.12115	1.11895
85				1.088	1.08443	1.08233	1.0761	1.0697	1.06847	1.06383	1.063	1.06077	1.05643	1.05373
60					1.0824	1.0781	1.0763	1.0712	1.0682	1.0657	1.0628	1.0587
40			1.10655	1.098	1.09595	1.0984	1.09205	1.0888	1.08715	1.0839
30					1.01047	1.00803	1.0058	1.0036	1.00227	0.997633
17.5				1.0701	1.0677	1.0639	1.0638	1.0607	1.0575	1.0563	1.0541	1.0529	1.0509
11					1.02287	1.02097	1.0171	1.01667	1.0147	1.01537	1.0141	1.01232	1.01033
8.5				1.0193	1.0178	1.01657	1.01573	1.01633	1.01583	1.0136	1.01283	1.00977	1.01113	1.01357	1.00943	1.0074	1.0075	1.00607
6.5			0.93405	0.93245	0.9312	0.929275	0.9271	0.928975	0.928475	0.926225	0.924425	0.923125	0.9223	0.923775	0.9214	0.91995
3.75					0.93445	0.932875	0.932375	0.931975	0.93185	0.930075	0.92835	0.926725	0.9276	0.928675	0.92625	0.92555
