# Supplementary material for: Measuring protein stability in the GroEL chaperonin cage reveals massive destabilization
Source: eLife. 2020 Jul 27;9:e56511. doi: 10.7554/eLife.56511 (PMC7440923; doi:10.7554/eLife.56511)
Supplement: Figure 5—figure supplement 1—source data 1. [file elife-56511-fig5-figsupp1-data1.xlsx]

## Sheet: Sheet1
time (nanoSec)	Free eGFP	Caged eGFP
2.4875	0.31175	0.30302
2.5125	0.31142	0.3006
2.5375	0.31347	0.30064
2.5625	0.31172	0.30032
2.5875	0.31202	0.30052
2.6125	0.31041	0.30038
2.6375	0.31028	0.30056
2.6625	0.30812	0.29946
2.6875	0.30845	0.29921
2.7125	0.30942	0.29929
2.7375	0.30994	0.29987
2.7625	0.30833	0.29756
2.7875	0.30635	0.29732
2.8125	0.30555	0.29662
2.8375	0.30567	0.29482
2.8625	0.30874	0.29788
2.8875	0.30539	0.29313
2.9125	0.30427	0.29401
2.9375	0.30461	0.2941
2.9625	0.30546	0.29327
2.9875	0.30246	0.29122
3.0125	0.30245	0.2943
3.0375	0.30327	0.28994
3.0625	0.30254	0.29107
3.0875	0.29957	0.29032
3.1125	0.30199	0.28893
3.1375	0.29932	0.29257
3.1625	0.29957	0.29014
3.1875	0.30067	0.28956
3.2125	0.29919	0.28818
3.2375	0.29826	0.28785
3.2625	0.29763	0.28641
3.2875	0.29794	0.28672
3.3125	0.29564	0.2888
3.3375	0.2967	0.28765
3.3625	0.29638	0.28414
3.3875	0.29561	0.28702
3.4125	0.29656	0.28626
3.4375	0.29556	0.28152
3.4625	0.29573	0.2846
3.4875	0.2932	0.28465
3.5125	0.29114	0.28245
3.5375	0.29389	0.28429
3.5625	0.2914	0.28062
3.5875	0.29262	0.28034
3.6125	0.29148	0.27903
3.6375	0.29109	0.28036
3.6625	0.2883	0.2817
3.6875	0.29075	0.28017
3.7125	0.28898	0.28073
3.7375	0.28936	0.2785
3.7625	0.28961	0.2791
3.7875	0.28692	0.28008
3.8125	0.28704	0.27956
3.8375	0.28503	0.27605
3.8625	0.28579	0.27607
3.8875	0.28644	0.27522
3.9125	0.28601	0.27587
3.9375	0.28737	0.27544
3.9625	0.28337	0.27485
3.9875	0.28279	0.27527
4.0125	0.28358	0.27293
4.0375	0.28305	0.27431
4.0625	0.28383	0.27372
4.0875	0.2807	0.27319
4.1125	0.2819	0.27299
4.1375	0.28029	0.27174
4.1625	0.28159	0.27512
4.1875	0.28184	0.27165
4.2125	0.28028	0.2721
4.2375	0.27822	0.26786
4.2625	0.27923	0.27059
4.2875	0.2785	0.26784
4.3125	0.27659	0.27041
4.3375	0.27711	0.26749
4.3625	0.27715	0.268
4.3875	0.27461	0.26931
4.4125	0.27592	0.26832
4.4375	0.2755	0.26826
4.4625	0.27572	0.26624
4.4875	0.27513	0.26585
4.5125	0.27499	0.26707
4.5375	0.27233	0.26549
4.5625	0.27369	0.26472
4.5875	0.27425	0.26513
4.6125	0.27043	0.26284
4.6375	0.27223	0.26274
4.6625	0.2716	0.26586
4.6875	0.27275	0.26588
4.7125	0.27101	0.26114
4.7375	0.26836	0.26387
4.7625	0.27016	0.26224
4.7875	0.26912	0.26077
4.8125	0.26959	0.26187
4.8375	0.26787	0.2602
4.8625	0.26632	0.25987
4.8875	0.26791	0.25819
4.9125	0.27137	0.25641
4.9375	0.26462	0.25793
4.9625	0.26739	0.25671
4.9875	0.26526	0.25842
5.0125	0.26715	0.25771
5.0375	0.26507	0.25488
5.0625	0.26462	0.25974
5.0875	0.26213	0.25457
5.1125	0.26272	0.2528
5.1375	0.26296	0.25578
5.1625	0.26066	0.25564
5.1875	0.26362	0.25441
5.2125	0.2622	0.25188
5.2375	0.26226	0.25395
5.2625	0.26036	0.25278
5.2875	0.25995	0.25277
5.3125	0.26189	0.25049
5.3375	0.25983	0.2502
5.3625	0.25963	0.25277
5.3875	0.25998	0.24982
5.4125	0.25901	0.25085
5.4375	0.26077	0.24944
5.4625	0.26113	0.25025
5.4875	0.25754	0.25005
5.5125	0.25823	0.25054
5.5375	0.25793	0.2496
5.5625	0.25426	0.24692
5.5875	0.25417	0.2493
5.6125	0.25441	0.24825
5.6375	0.25432	0.24604
5.6625	0.25905	0.25135
5.6875	0.25426	0.24675
5.7125	0.25101	0.25148
5.7375	0.25099	0.24665
5.7625	0.24873	0.2446
5.7875	0.25133	0.24304
5.8125	0.25138	0.2449
5.8375	0.25535	0.24334
5.8625	0.25156	0.24709
5.8875	0.25146	0.24551
5.9125	0.25125	0.24599
5.9375	0.24912	0.24798
5.9625	0.25096	0.24237
5.9875	0.24909	0.2465
6.0125	0.24928	0.24176
6.0375	0.24808	0.24019
6.0625	0.24777	0.24195
6.0875	0.24697	0.23914
6.1125	0.24726	0.23744
6.1375	0.2449	0.24096
6.1625	0.24639	0.24549
6.1875	0.2448	0.24098
6.2125	0.24599	0.23817
6.2375	0.23855	0.23977
6.2625	0.24467	0.23997
6.2875	0.24144	0.23509
6.3125	0.24389	0.23985
6.3375	0.24346	0.24139
6.3625	0.24432	0.23756
6.3875	0.24264	0.24013
6.4125	0.24186	0.2361
6.4375	0.2435	0.23408
6.4625	0.23807	0.23615
6.4875	0.24111	0.23526
6.5125	0.24253	0.23187
6.5375	0.24021	0.23626
6.5625	0.23729	0.23252
6.5875	0.2404	0.23601
6.6125	0.23679	0.23569
6.6375	0.23922	0.23247
6.6625	0.23772	0.23195
6.6875	0.24113	0.23309
6.7125	0.23705	0.23011
6.7375	0.23935	0.22818
6.7625	0.2363	0.2344
6.7875	0.23653	0.23134
6.8125	0.23664	0.23323
6.8375	0.23488	0.23259
6.8625	0.23381	0.22461
6.8875	0.23105	0.22845
6.9125	0.23179	0.23696
6.9375	0.23139	0.22693
6.9625	0.23315	0.23586
6.9875	0.23493	0.22876
7.0125	0.23596	0.22893
7.0375	0.23174	0.23125
7.0625	0.23079	0.23063
7.0875	0.22724	0.22859
7.1125	0.23341	0.22908
7.1375	0.23363	0.23005
7.1625	0.23386	0.22656
7.1875	0.23378	0.22606
7.2125	0.23163	0.22404
7.2375	0.22851	0.22279
7.2625	0.22955	0.22536
7.2875	0.22802	0.22187
7.3125	0.23019	0.22975
7.3375	0.22596	0.23008
7.3625	0.22268	0.22119
7.3875	0.23005	0.22677
7.4125	0.22603	0.22034
7.4375	0.2231	0.22581
7.4625	0.22716	0.2266
7.4875	0.22693	0.22313
7.5125	0.22842	0.22535
7.5375	0.22915	0.22036
7.5625	0.22437	0.22184
7.5875	0.21489	0.21683
7.6125	0.22414	0.22088
7.6375	0.22085	0.22499
7.6625	0.226	0.22707
7.6875	0.21902	0.21592
7.7125	0.224	0.22
7.7375	0.21938	0.21834
7.7625	0.22388	0.21649
7.7875	0.22448	0.2199
7.8125	0.22493	0.21608
7.8375	0.22156	0.22176
7.8625	0.22105	0.21667
7.8875	0.21969	0.22061
7.9125	0.21918	0.21407
7.9375	0.21844	0.21618
7.9625	0.21741	0.2097
7.9875	0.22031	0.21904
8.0125	0.21924	0.21731
8.0375	0.21629	0.21278
8.0625	0.21023	0.21383
8.0875	0.22051	0.21831
8.1125	0.21512	0.21775
8.1375	0.21951	0.21472
8.1625	0.21473	0.21486
8.1875	0.21911	0.21343
8.2125	0.21439	0.21282
8.2375	0.211	0.21625
8.2625	0.21254	0.20942
8.2875	0.21689	0.21179
8.3125	0.21676	0.20589
8.3375	0.21338	0.21485
8.3625	0.21951	0.20743
8.3875	0.21412	0.21116
8.4125	0.21255	0.21075
8.4375	0.21416	0.20454
8.4625	0.2122	0.20616
8.4875	0.21254	0.20733
8.5125	0.21039	0.19974
8.5375	0.21118	0.20946
8.5625	0.21281	0.20881
8.5875	0.21336	0.20532
8.6125	0.21315	0.20696
8.6375	0.21196	0.20011
8.6625	0.20781	0.20846
8.6875	0.21157	0.20336
8.7125	0.21015	0.20608
8.7375	0.20844	0.20765
8.7625	0.20348	0.20568
8.7875	0.20905	0.20456
8.8125	0.21024	0.20365
8.8375	0.21202	0.20706
8.8625	0.20513	0.2064
8.8875	0.20522	0.20737
8.9125	0.21087	0.20203
8.9375	0.20835	0.20395
8.9625	0.20258	0.2107
8.9875	0.20922	0.19922
9.0125	0.20262	0.2046
9.0375	0.20645	0.20552
9.0625	0.20167	0.20689
9.0875	0.2037	0.20537
9.1125	0.20404	0.20333
9.1375	0.19843	0.20675
9.1625	0.20496	0.19569
9.1875	0.20781	0.20012
9.2125	0.19992	0.1966
9.2375	0.20117	0.2026
9.2625	0.20242	0.19655
9.2875	0.20304	0.19805
9.3125	0.20082	0.20382
9.3375	0.20192	0.20563
9.3625	0.19084	0.19671
9.3875	0.2002	0.19666
9.4125	0.19728	0.19187
9.4375	0.20045	0.19873
9.4625	0.20031	0.19311
9.4875	0.19485	0.18973
9.5125	0.20174	0.19186
9.5375	0.19914	0.19109
9.5625	0.19565	0.18918
9.5875	0.1973	0.19128
9.6125	0.19519	0.19494
9.6375	0.20389	0.19265
9.6625	0.19666	0.18544
9.6875	0.20012	0.19769
9.7125	0.19282	0.2008
9.7375	0.19218	0.1932
9.7625	0.19355	0.20534
9.7875	0.19677	0.18266
9.8125	0.1974	0.1878
9.8375	0.19345	0.1916
9.8625	0.18892	0.18906
9.8875	0.1915	0.18886
9.9125	0.1924	0.19362
9.9375	0.19455	0.19157
9.9625	0.1926	0.18877
9.9875	0.19204	0.1974
10.0125	0.1973	0.18405
10.0375	0.19391	0.19174
10.0625	0.19096	0.2011
10.0875	0.19044	0.19232
10.1125	0.18904	0.18778
10.1375	0.19091	0.1915
10.1625	0.19014	0.19699
10.1875	0.18784	0.19032
10.2125	0.18394	0.18827
10.2375	0.18905	0.18834
10.2625	0.19326	0.18922
10.2875	0.18677	0.19016
10.3125	0.19157	0.18688
10.3375	0.19236	0.17569
10.3625	0.18552	0.1841
10.3875	0.18692	0.19275
10.4125	0.19195	0.20078
10.4375	0.18361	0.18711
10.4625	0.18605	0.18409
10.4875	0.19216	0.1861
10.5125	0.17767	0.18168
10.5375	0.18736	0.18946
10.5625	0.19208	0.19201
10.5875	0.18448	0.18841
10.6125	0.18582	0.17768
10.6375	0.18324	0.18991
10.6625	0.18589	0.18015
10.6875	0.18043	0.18679
10.7125	0.18532	0.18666
10.7375	0.18623	0.18972
10.7625	0.18742	0.1843
10.7875	0.18948	0.18115
10.8125	0.17904	0.17992
10.8375	0.17705	0.18087
10.8625	0.17991	0.17263
10.8875	0.18551	0.18408
10.9125	0.17853	0.18456
10.9375	0.17523	0.17898
10.9625	0.18144	0.1811
10.9875	0.18182	0.17759
11.0125	0.18256	0.18813
11.0375	0.17565	0.18103
11.0625	0.17569	0.17773
11.0875	0.17397	0.17011
11.1125	0.17831	0.17751
11.1375	0.17809	0.1822
11.1625	0.18044	0.18576
11.1875	0.183	0.18484
11.2125	0.17788	0.18089
11.2375	0.17859	0.1778
11.2625	0.17628	0.16547
11.2875	0.18098	0.17873
11.3125	0.17481	0.17958
11.3375	0.17047	0.18277
11.3625	0.17285	0.17544
11.3875	0.17277	0.17258
11.4125	0.17283	0.16751
11.4375	0.17423	0.17504
11.4625	0.17719	0.1744
11.4875	0.18304	0.18499
11.5125	0.17292	0.1893
11.5375	0.17656	0.18426
11.5625	0.18031	0.17866
11.5875	0.17993	0.17107
11.6125	0.18635	0.17723
11.6375	0.16963	0.17384
11.6625	0.16534	0.17013
11.6875	0.17587	0.16487
11.7125	0.18073	0.16457
11.7375	0.17428	0.18086
11.7625	0.17904	0.18356
11.7875	0.17037	0.1769
11.8125	0.17471	0.17277
11.8375	0.17019	0.17027
11.8625	0.17238	0.17522
11.8875	0.16374	0.16302
11.9125	0.16708	0.16088
11.9375	0.17175	0.17906
11.9625	0.16982	0.17324
11.9875	0.17074	0.16457
12.0125	0.17312	0.15622
12.0375	0.17507	0.16523
12.0625	0.17539	0.17416
12.0875	0.16503	0.17583
12.1125	0.17503	0.16092
12.1375	0.1714	0.15801
12.1625	0.16182	0.18639
12.1875	0.1586	0.15909
12.2125	0.16954	0.17855
12.2375	0.17024	0.1589
12.2625	0.16318	0.16851
12.2875	0.17491	0.16191
12.3125	0.15345	0.17115
12.3375	0.15597	0.14952
12.3625	0.17077	0.17811
12.3875	0.16228	0.14932
12.4125	0.17509	0.17994
12.4375	0.16868	0.16024
12.4625	0.15879	0.16687
12.4875	0.16679	0.15995
12.5125	0.18124	0.18415
12.5375	0.16956	0.1717
12.5625	0.15573	0.17278
12.5875	0.17088	0.1695
12.6125	0.16611	0.16109
12.6375	0.15265	0.16616
12.6625	0.16907	0.16264
12.6875	0.15478	0.18351
12.7125	0.16247	0.1573
12.7375	0.15706	0.15208
12.7625	0.16482	0.16866
12.7875	0.15655	0.15429
12.8125	0.17779	0.16001
12.8375	0.16159	0.16341
12.8625	0.14938	0.15737
12.8875	0.1602	0.16126
12.9125	0.16092	0.16074
12.9375	0.16734	0.15223
12.9625	0.14356	0.14375
12.9875	0.15626	0.16284
13.0125	0.1571	0.15786
13.0375	0.17198	0.16315
13.0625	0.15599	0.15072
13.0875	0.14888	0.14871
13.1125	0.15708	0.17371
13.1375	0.16187	0.14868
13.1625	0.15017	0.15543
13.1875	0.1576	0.16211
13.2125	0.16456	0.13859
13.2375	0.15625	0.17309
13.2625	0.16096	0.15472
13.2875	0.15216	0.15385
13.3125	0.14661	0.16658
13.3375	0.14925	0.16718
13.3625	0.16503	0.16602
13.3875	0.15258	0.16456
13.4125	0.14957	0.15056
13.4375	0.16099	0.17193
13.4625	0.15527	0.15656
13.4875	0.15293	0.15024
13.5125	0.15034	0.14873
13.5375	0.14302	0.16749
13.5625	0.15717	0.1469
13.5875	0.14855	0.14771
13.6125	0.16747	0.147
13.6375	0.15831	0.15578
13.6625	0.1654	0.16837
13.6875	0.16214	0.15655
13.7125	0.15168	0.15863
13.7375	0.15876	0.15165
13.7625	0.15945	0.1852
13.7875	0.14824	0.15287
13.8125	0.15708	0.15369
13.8375	0.15184	0.1493
13.8625	0.14761	0.1484
13.8875	0.12939	0.17109
13.9125	0.14248	0.16061
13.9375	0.15918	0.12887
13.9625	0.15005	0.14584
13.9875	0.14807	0.15743
14.0125	0.14706	0.14948
14.0375	0.15699	0.15075
14.0625	0.13472	0.1508
14.0875	0.16256	0.14717
14.1125	0.13904	0.12449
14.1375	0.14153	0.14297
14.1625	0.15313	0.1402
14.1875	0.14356	0.14003
14.2125	0.147	0.1435
14.2375	0.15484	0.14787
14.2625	0.13427	0.15359
14.2875	0.17406	0.1564
14.3125	0.13931	0.15142
14.3375	0.16247	0.14109
14.3625	0.14783	0.13932
14.3875	0.13148	0.15382
14.4125	0.14979	0.15742
14.4375	0.14217	0.16439
14.4625	0.13408	0.16035
14.4875	0.16633	0.16361
14.5125	0.13818	0.14943
14.5375	0.14537	0.13717
14.5625	0.14934	0.14396
14.5875	0.15594	0.15278
14.6125	0.1453	0.14708
14.6375	0.13702	0.12713
14.6625	0.14563	0.14548
14.6875	0.15993	0.13674
14.7125	0.13028	0.13641
14.7375	0.13613	0.15733
14.7625	0.12889	0.14716
14.7875	0.15484	0.14848
14.8125	0.14445	0.15607
14.8375	0.13993	0.15243
14.8625	0.15512	0.1462
14.8875	0.14923	0.15642
14.9125	0.13255	0.16418
14.9375	0.13811	0.13406
14.9625	0.14251	0.16077
14.9875	0.14137	0.1343
15.0125	0.1393	0.14505
15.0375	0.14696	0.1473
15.0625	0.14888	0.15163
15.0875	0.14307	0.13366
15.1125	0.13636	0.14478
15.1375	0.12849	0.15729
15.1625	0.14346	0.13285
15.1875	0.15178	0.13291
15.2125	0.12744	0.14588
15.2375	0.13194	0.16104
15.2625	0.14854	0.13792
15.2875	0.14735	0.13709
15.3125	0.13886	0.14191
15.3375	0.15002	0.13767
15.3625	0.13073	0.12649
15.3875	0.13619	0.13977
15.4125	0.14982	0.13435
15.4375	0.13623	0.13979
15.4625	0.14735	0.13557
15.4875	0.1323	0.16025
15.5125	0.13131	0.13338
15.5375	0.14866	0.13448
15.5625	0.12477	0.12951
15.5875	0.1634	0.14232
15.6125	0.13603	0.14245
15.6375	0.14593	0.13807
15.6625	0.14072	0.14163
15.6875	0.12481	0.11186
15.7125	0.14214	0.11315
15.7375	0.13326	0.13376
15.7625	0.12165	0.15011
15.7875	0.13647	0.14272
15.8125	0.13546	0.12043
15.8375	0.16316	0.10286
15.8625	0.11835	0.12957
15.8875	0.11496	0.15278
15.9125	0.12331	0.1191
15.9375	0.13151	0.11524
15.9625	0.12762	0.12795
15.9875	0.14883	0.1427
16.0125	0.13746	0.11019
16.0375	0.14093	0.1298
16.0625	0.1348	0.17961
16.0875	0.1414	0.13342
16.1125	0.13595	0.1107
16.1375	0.13	0.13292
16.1625	0.12552	0.13045
16.1875	0.10725	0.13127
16.2125	0.13578	0.12437
16.2375	0.14207	0.14641
16.2625	0.14325	0.11534
16.2875	0.13231	0.11722
16.3125	0.13114	0.16456
16.3375	0.13551	0.12391
16.3625	0.13011	0.13694
16.3875	0.13788	0.11655
16.4125	0.11964	0.13051
16.4375	0.1399	0.12329
16.4625	0.11439	0.12167
16.4875	0.12739	0.14789
16.5125	0.12729	0.10204
16.5375	0.13177	0.10649
16.5625	0.13125	0.10931
16.5875	0.13599	0.14731
16.6125	0.12805	0.12206
16.6375	0.11744	0.16378
16.6625	0.12909	0.13314
16.6875	0.12648	0.15765
16.7125	0.1213	0.13579
16.7375	0.12291	0.12252
16.7625	0.13537	0.11675
16.7875	0.12557	0.1171
16.8125	0.13973	0.11338
16.8375	0.14815	0.12221
16.8625	0.1309	0.12802
16.8875	0.10828	0.1299
16.9125	0.11331	0.14175
16.9375	0.11478	0.1314
16.9625	0.10768	0.1309
16.9875	0.12369	0.14297
17.0125	0.13163	0.13689
17.0375	0.1303	0.12787
17.0625	0.13328	0.14518
17.0875	0.09905	0.13034
17.1125	0.10438	0.11966
17.1375	0.13611	0.11774
17.1625	0.12015	0.1246
17.1875	0.1055	0.12429
17.2125	0.14392	0.10698
17.2375	0.12364	0.12772
17.2625	0.15632	0.13445
17.2875	0.1138	0.12702
17.3125	0.11332	0.14234
17.3375	0.12668	0.13798
17.3625	0.10684	0.15039
17.3875	0.09671	0.13193
17.4125	0.13753	0.12167
17.4375	0.13415	0.17013
17.4625	0.10327	0.12865
17.4875	0.15679	0.12091
17.5125	0.12188	0.13688
17.5375	0.11001	0.11338
17.5625	0.13312	0.13953
17.5875	0.11823	0.12785
17.6125	0.14567	0.13076
17.6375	0.11879	0.14161
17.6625	0.13466	0.13006
17.6875	0.14652	0.1297
17.7125	0.09669	0.11039
17.7375	0.12508	0.13236
17.7625	0.1412	0.11148
17.7875	0.11015	0.1219
17.8125	0.14014	0.1156
17.8375	0.13879	0.14462
17.8625	0.14305	0.10454
17.8875	0.12885	0.06531
17.9125	0.13384	0.12213
17.9375	0.11127	0.08461
17.9625	0.1102	0.12262
17.9875	0.10565	0.12211
18.0125	0.08501	0.13919
18.0375	0.10705	0.14816
18.0625	0.10231	0.15886
18.0875	0.10677	0.12376
18.1125	0.14001	0.11409
18.1375	0.11141	0.12065
18.1625	0.13228	0.07708
18.1875	0.10461	0.12174
18.2125	0.1096	0.12408
18.2375	0.10479	0.09275
18.2625	0.12516	0.10399
18.2875	0.12258	0.11669
18.3125	0.14029	0.12396
18.3375	0.13568	0.12788
18.3625	0.1176	0.13085
18.3875	0.12168	0.10955
18.4125	0.13462	0.11137
18.4375	0.10302	0.10273
18.4625	0.12751	0.11251
18.4875	0.0761	0.12765
18.5125	0.13135	0.1028
18.5375	0.12758	0.1313
18.5625	0.12178	0.14139
18.5875	0.13795	0.11402
18.6125	0.11754	0.10066
18.6375	0.12204	0.0976
18.6625	0.09889	0.14763
18.6875	0.08672	0.11605
18.7125	0.10631	0.12592
18.7375	0.14603	0.13932
18.7625	0.12658	0.12233
18.7875	0.11561	0.09593
18.8125	0.10719	0.12259
18.8375	0.1316	0.10752
18.8625	0.12037	0.11198
18.8875	0.10745	0.12821
18.9125	0.1332	0.08786
18.9375	0.11323	0.10629
18.9625	0.14286	0.0904
18.9875	0.13318	0.11574
19.0125	0.10901	0.09628
19.0375	0.12838	0.08669
19.0625	0.11037	0.12944
19.0875	0.099	0.0882
19.1125	0.1285	0.15464
19.1375	0.14909	0.15082
19.1625	0.12384	0.13737
19.1875	0.14731	0.12103
19.2125	0.159	0.0836
19.2375	0.10493	0.12292
19.2625	0.10788	0.11245
19.2875	0.12227	0.13043
19.3125	0.0744	0.13926
19.3375	0.14708	0.08435
19.3625	0.12518	0.1604
19.3875	0.09545	0.09807
19.4125	0.13768	0.13874
19.4375	0.09368	0.13591
19.4625	0.12106	0.11881
19.4875	0.10092	0.07995
19.5125	0.10413	0.10981
19.5375	0.13976	0.1597
19.5625	0.09662	0.08389
19.5875	0.10842	0.12753
19.6125	0.1525	0.13476
19.6375	0.0982	0.1445
19.6625	0.09185	0.14557
19.6875	0.13174	0.13038
19.7125	0.12235	0.10453
19.7375	0.1193	0.08297
19.7625	0.13757	0.09353
19.7875	0.10633	0.12767
19.8125	0.12257	0.15431
19.8375	0.10315	0.0992
19.8625	0.09107	0.11235
19.8875	0.11765	0.11007
19.9125	0.10258	0.13115
19.9375	0.08082	0.07754
19.9625	0.10282	0.09216
19.9875	0.09704	0.1128
20.0125	0.07515	0.11007
20.0375	0.12154	0.11741
20.0625	0.13103	0.10288
20.0875	0.09672	0.08179
20.1125	0.15217	0.07829
20.1375	0.10731	0.09534
20.1625	0.14627	0.12844
20.1875	0.10215	0.11559
20.2125	0.12354	0.10653
20.2375	0.06704	0.15595
20.2625	0.11411	0.10362
20.2875	0.14286	0.0951
20.3125	0.13977	0.08905
20.3375	0.08615	0.12207
20.3625	0.11339	0.10992
20.3875	0.10248	0.12985
20.4125	0.09891	0.10981
20.4375	0.07784	0.12643
20.4625	0.1383	0.07212
20.4875	0.11707	0.07431
20.5125	0.1218	0.16908
20.5375	0.07508	0.10638
20.5625	0.11168	0.11962
20.5875	0.10472	0.11073
20.6125	0.12356	0.07766
20.6375	0.04944	0.14886
20.6625	0.10083	0.10103
20.6875	0.08753	0.13065
20.7125	0.10067	0.08661
20.7375	0.09868	0.12478
20.7625	0.10394	0.09439
20.7875	0.10891	0.09193
20.8125	0.07071	0.1375
20.8375	0.09816	0.14173
20.8625	0.11125	0.05429
20.8875	0.13616	0.11047
20.9125	0.08922	0.13904
20.9375	0.08875	0.10733
20.9625	0.15012	0.10687
20.9875	0.15405	0.09073
21.0125	0.12636	0.11213
21.0375	0.11519	0.10275
21.0625	0.0704	0.08395
21.0875	0.07459	0.12291
21.1125	0.09594	0.09002
21.1375	0.12534	0.06764
21.1625	0.12266	0.12392
21.1875	0.08921	0.11186
21.2125	0.1	0.08108
21.2375	0.0901	0.09885
21.2625	0.11667	0.19
21.2875	0.12256	0.10144
21.3125	0.09571	0.03271
21.3375	0.08677	0.1003
21.3625	0.17371	0.07505
21.3875	0.09227	0.12625
21.4125	0.09852	0.07182
21.4375	0.12785	0.0042
21.4625	0.06684	0.10658
21.4875	0.08475	0.08639
21.5125	0.09621	0.04664
21.5375	0.15481	0.06832
21.5625	0.11142	0.10733
21.5875	0.10045	0.10667
21.6125	0.11468	0.10968
21.6375	0.09934	0.13948
21.6625	0.08128	0.17308
21.6875	0.12962	0.08639
21.7125	0.05825	0.13669
21.7375	0.10484	0.07412
21.7625	0.10462	0.06494
21.7875	0.07618	0.10102
21.8125	0.07365	0.09562
21.8375	0.10744	0.15202
21.8625	0.05775	0.1049
21.8875	0.06981	0.08353
21.9125	0.06743	0.10108
21.9375	0.12558	0.176
21.9625	0.14634	0.10039
21.9875	0.13423	0.10961
22.0125	0.11824	0.13777
22.0375	0.10526	0.12102
22.0625	0.10877	0.13941
22.0875	0.12308	0.13147
22.1125	0.07534	0.17127
22.1375	0.0954	0.0989
22.1625	0.11132	0.04188
22.1875	0.12522	0.08552
22.2125	0.13237	0.08402
22.2375	0.06952	0.06897
22.2625	0.08369	0.05772
22.2875	0.0582	0.13559
22.3125	0.1137	0.13068
22.3375	0.07394	0.05263
22.3625	0.13107	0.08871
22.3875	0.09283	0.08943
22.4125	0.06972	0.05263
22.4375	0.14676	0.0885
22.4625	0.03473	0.07273
22.4875	0.10112	0.06478
22.5125	0.088	0.13295
22.5375	0.17075	0.08732
22.5625	0.12069	0.03817
22.5875	0.08786	0.16667
22.6125	0.10491	0.09341
22.6375	0.10559	0.0315
22.6625	0.11921	0.07989
22.6875	0.11324	0.09552
22.7125	0.12624	0.07413
22.7375	0.07861	0.08547
22.7625	0.07171	0.05936
22.7875	0.13284	0.09451
22.8125	0.15604	0.14286
22.8375	0.07788	0.12821
22.8625	0.16779	0.04724
22.8875	0.12094	0.0496
22.9125	0.05361	0.1
22.9375	0.05193	0.06279
22.9625	0.16055	0.10476
22.9875	0.10124	0.17021
23.0125	0.16447	0.12146
23.0375	0.03571	0.14024
23.0625	0.03206	0.10553
23.0875	0.09016	0.02941
23.1125	0.10419	0.10586
23.1375	0.11316	0.11919
23.1625	0.10324	0.14917
23.1875	0.12022	0.17838
23.2125	--	--
23.2375	0.10211	0.15596
23.2625	0.09795	0.10954
23.2875	0.08206	0.10236
23.3125	0.01896	0.04854
23.3375	0.07995	0.10616
23.3625	0.12469	0.13443
23.3875	0.13517	0.112
23.4125	0.05736	0.0625
23.4375	0.06202	0.20073
23.4625	0.07879	0.04042
23.4875	0.08725	0.19421
23.5125	0.08554	0.11213
23.5375	0.13659	0.075
23.5625	0.07721	0.14206
23.5875	0.12242	0.06727
23.6125	0.12567	0.10117
23.6375	0.13929	0.12195
23.6625	0.13386	0.15419
23.6875	0.16986	0.16732
23.7125	0.15447	0.03774
23.7375	0.05845	0.09836
23.7625	0.14091	0.16
23.7875	0.10899	0.11837
23.8125	0.08851	0.0625
23.8375	0.11268	0.20482
23.8625	0.16087	0.19231
23.8875	0.05348	0.07895
23.9125	0.02996	0.11515
23.9375	0.09375	0.12409
23.9625	0.04943	0.12716
23.9875	0.10292	0.03929
24.0125	0.11818	0.05904
24.0375	0.08275	0.04545
24.0625	0.08516	0.13122
24.0875	0.11867	0.15473
24.1125	0.01238	0.03
24.1375	0.05491	0.17401
24.1625	0.16822	0.13253
24.1875	0.09158	0.13449
24.2125	0.15396	0.14945
24.2375	--	--
24.2625	0.08621	0.09868
24.2875	-0.01818	0.10268
24.3125	0.19122	0.02772
24.3375	0.03892	0.12134
24.3625	0.06528	0.09785
24.3875	0.10138	0.07216
24.4125	0.08831	0.11475
24.4375	0.16225	0.05435
24.4625	0.13841	0.07583
24.4875	0.12709	0.12258
24.5125	0.08108	0.09459
24.5375	0.08896	0.11893
24.5625	0.18692	0.02463
24.5875	0.10687	0.08537
24.6125	0.06965	0.04545
24.6375	0.07	0.01969
24.6625	0.08675	0.10152
24.6875	0.02649	0.07042
24.7125	0.07458	0.1049
24.7375	0.18919	0.12
24.7625	0.09709	0.06338
24.7875	0.15066	0.13594
24.8125	0.04851	0.05263
24.8375	-0.00159	0.05152
24.8625	0.08257	0.05752
24.8875	0.08609	0.1
24.9125	0.07166	0.10309
24.9375	0.07652	0.1153
24.9625	0.0365	0.06723
24.9875	0.09353	0.09548
