# Supplementary material for: Measuring protein stability in the GroEL chaperonin cage reveals massive destabilization
Source: eLife. 2020 Jul 27;9:e56511. doi: 10.7554/eLife.56511 (PMC7440923; doi:10.7554/eLife.56511)
Supplement: Figure 5—source data 1. [file elife-56511-fig5-data1.xlsx]

## Sheet: Sheet1
time (nanoSec)	Free Chimera	Caged chimera
2.4875	0.32336	0.31933
2.5125	0.32307	0.31885
2.5375	0.32166	0.31776
2.5625	0.32324	0.31786
2.5875	0.32274	0.31918
2.6125	0.32276	0.31673
2.6375	0.32297	0.31517
2.6625	0.32181	0.31696
2.6875	0.32078	0.31561
2.7125	0.32013	0.31642
2.7375	0.31994	0.31745
2.7625	0.31852	0.3164
2.7875	0.31896	0.31604
2.8125	0.3162	0.31554
2.8375	0.31769	0.31565
2.8625	0.318	0.31508
2.8875	0.31704	0.31462
2.9125	0.31717	0.31427
2.9375	0.31741	0.31405
2.9625	0.31841	0.31356
2.9875	0.31679	0.31309
3.0125	0.31401	0.31295
3.0375	0.31752	0.31619
3.0625	0.31509	0.31157
3.0875	0.31467	0.31097
3.1125	0.3151	0.31169
3.1375	0.31503	0.31078
3.1625	0.3146	0.31077
3.1875	0.31302	0.30814
3.2125	0.31381	0.31016
3.2375	0.3122	0.30884
3.2625	0.3092	0.30964
3.2875	0.31309	0.30945
3.3125	0.30963	0.30561
3.3375	0.31008	0.3076
3.3625	0.30928	0.30704
3.3875	0.30915	0.30861
3.4125	0.31005	0.30698
3.4375	0.3063	0.30593
3.4625	0.30926	0.30508
3.4875	0.31008	0.30725
3.5125	0.30969	0.30562
3.5375	0.30981	0.30541
3.5625	0.30746	0.30511
3.5875	0.30842	0.30398
3.6125	0.30971	0.303
3.6375	0.30722	0.30519
3.6625	0.30768	0.30193
3.6875	0.30712	0.30595
3.7125	0.30771	0.30398
3.7375	0.30553	0.30198
3.7625	0.30424	0.30328
3.7875	0.30418	0.30402
3.8125	0.30433	0.2994
3.8375	0.30206	0.29895
3.8625	0.304	0.30045
3.8875	0.30226	0.30208
3.9125	0.30331	0.30271
3.9375	0.29942	0.30033
3.9625	0.3029	0.29849
3.9875	0.30397	0.2987
4.0125	0.30342	0.29826
4.0375	0.30112	0.2983
4.0625	0.30189	0.30192
4.0875	0.29948	0.29804
4.1125	0.29855	0.30103
4.1375	0.29909	0.29196
4.1625	0.30124	0.29838
4.1875	0.29921	0.29756
4.2125	0.29932	0.29773
4.2375	0.29445	0.29491
4.2625	0.2981	0.29775
4.2875	0.29633	0.2934
4.3125	0.2972	0.29598
4.3375	0.29625	0.29612
4.3625	0.29616	0.29583
4.3875	0.29677	0.29338
4.4125	0.29691	0.29687
4.4375	0.29664	0.29403
4.4625	0.29462	0.29466
4.4875	0.29607	0.29382
4.5125	0.29599	0.29435
4.5375	0.29284	0.29273
4.5625	0.29637	0.29215
4.5875	0.29543	0.29225
4.6125	0.29412	0.2936
4.6375	0.29298	0.29162
4.6625	0.29356	0.28989
4.6875	0.29021	0.29048
4.7125	0.29326	0.28665
4.7375	0.29153	0.29078
4.7625	0.2919	0.29049
4.7875	0.29213	0.28806
4.8125	0.28993	0.29466
4.8375	0.29202	0.28897
4.8625	0.29288	0.28838
4.8875	0.28972	0.29118
4.9125	0.28412	0.29107
4.9375	0.29233	0.28611
4.9625	0.28551	0.29161
4.9875	0.2886	0.28774
5.0125	0.28881	0.28779
5.0375	0.2842	0.282
5.0625	0.28393	0.28781
5.0875	0.28722	0.28472
5.1125	0.2858	0.28622
5.1375	0.28556	0.28441
5.1625	0.28945	0.2843
5.1875	0.28622	0.28568
5.2125	0.28343	0.28201
5.2375	0.28706	0.28357
5.2625	0.28741	0.2855
5.2875	0.28334	0.28286
5.3125	0.28378	0.28464
5.3375	0.28412	0.28446
5.3625	0.27895	0.28377
5.3875	0.28267	0.28696
5.4125	0.28368	0.28234
5.4375	0.2842	0.28443
5.4625	0.28299	0.28148
5.4875	0.27748	0.27823
5.5125	0.28337	0.28178
5.5375	0.2808	0.27869
5.5625	0.28557	0.28046
5.5875	0.2808	0.27754
5.6125	0.27551	0.28026
5.6375	0.2801	0.27803
5.6625	0.27823	0.27996
5.6875	0.27472	0.28054
5.7125	0.28102	0.27636
5.7375	0.27754	0.27702
5.7625	0.27947	0.28091
5.7875	0.27732	0.28366
5.8125	0.27836	0.28244
5.8375	0.28089	0.27559
5.8625	0.27737	0.27747
5.8875	0.27884	0.28039
5.9125	0.27637	0.27856
5.9375	0.27528	0.27962
5.9625	0.27659	0.27806
5.9875	0.27601	0.28008
6.0125	0.27156	0.27466
6.0375	0.27718	0.27893
6.0625	0.27354	0.27051
6.0875	0.27541	0.27455
6.1125	0.276	0.27847
6.1375	0.27527	0.27405
6.1625	0.27036	0.27437
6.1875	0.27139	0.27477
6.2125	0.27426	0.27695
6.2375	0.2683	0.27669
6.2625	0.27265	0.27447
6.2875	0.2721	0.27048
6.3125	0.27349	0.27186
6.3375	0.27165	0.27055
6.3625	0.27179	0.27674
6.3875	0.27271	0.27295
6.4125	0.27042	0.26993
6.4375	0.27239	0.2744
6.4625	0.26952	0.27055
6.4875	0.26723	0.27109
6.5125	0.26656	0.27378
6.5375	0.27039	0.2713
6.5625	0.26622	0.26719
6.5875	0.27266	0.26852
6.6125	0.26778	0.26741
6.6375	0.27061	0.27292
6.6625	0.26868	0.27337
6.6875	0.2682	0.26919
6.7125	0.26334	0.26851
6.7375	0.26019	0.26327
6.7625	0.26465	0.2668
6.7875	0.26792	0.27041
6.8125	0.26653	0.26611
6.8375	0.26624	0.2731
6.8625	0.26094	0.26161
6.8875	0.26161	0.26468
6.9125	0.26234	0.26951
6.9375	0.26468	0.26515
6.9625	0.25948	0.26362
6.9875	0.26409	0.26249
7.0125	0.26733	0.26934
7.0375	0.26602	0.27042
7.0625	0.26269	0.26642
7.0875	0.26556	0.26623
7.1125	0.26232	0.26708
7.1375	0.25856	0.26188
7.1625	0.25756	0.26039
7.1875	0.26157	0.26455
7.2125	0.26195	0.26377
7.2375	0.25842	0.2596
7.2625	0.2606	0.26797
7.2875	0.26045	0.26237
7.3125	0.25939	0.26304
7.3375	0.25959	0.26386
7.3625	0.26068	0.25992
7.3875	0.2588	0.26628
7.4125	0.25883	0.26293
7.4375	0.25187	0.25886
7.4625	0.26154	0.26368
7.4875	0.26414	0.26489
7.5125	0.25689	0.26152
7.5375	0.25634	0.25525
7.5625	0.25731	0.25594
7.5875	0.25998	0.26294
7.6125	0.25876	0.25705
7.6375	0.25646	0.25929
7.6625	0.25253	0.26377
7.6875	0.25321	0.26017
7.7125	0.25675	0.26056
7.7375	0.25838	0.26032
7.7625	0.25828	0.25695
7.7875	0.25909	0.25785
7.8125	0.25265	0.25883
7.8375	0.2532	0.26029
7.8625	0.25594	0.25711
7.8875	0.24671	0.24954
7.9125	0.25534	0.25323
7.9375	0.25834	0.26501
7.9625	0.25247	0.25917
7.9875	0.24987	0.25212
8.0125	0.25449	0.26278
8.0375	0.25166	0.25104
8.0625	0.24994	0.25513
8.0875	0.25295	0.25986
8.1125	0.24604	0.2539
8.1375	0.25308	0.25736
8.1625	0.25457	0.25324
8.1875	0.25087	0.25808
8.2125	0.25165	0.25176
8.2375	0.24683	0.24748
8.2625	0.24831	0.25627
8.2875	0.25006	0.25238
8.3125	0.24103	0.25349
8.3375	0.23903	0.24953
8.3625	0.24605	0.24591
8.3875	0.24675	0.2601
8.4125	0.24274	0.25761
8.4375	0.24884	0.24824
8.4625	0.24832	0.24887
8.4875	0.24733	0.25714
8.5125	0.25211	0.24924
8.5375	0.24685	0.24698
8.5625	0.244	0.25258
8.5875	0.24744	0.24694
8.6125	0.24775	0.25164
8.6375	0.24765	0.25585
8.6625	0.24345	0.24913
8.6875	0.24608	0.26085
8.7125	0.24317	0.24675
8.7375	0.24145	0.24282
8.7625	0.24436	0.24918
8.7875	0.24007	0.24886
8.8125	0.24525	0.24849
8.8375	0.24069	0.25071
8.8625	0.24654	0.24591
8.8875	0.24171	0.2493
8.9125	0.24085	0.24643
8.9375	0.24396	0.24685
8.9625	0.246	0.24169
8.9875	0.24025	0.24592
9.0125	0.23969	0.24944
9.0375	0.23812	0.25028
9.0625	0.23857	0.24916
9.0875	0.23317	0.23774
9.1125	0.23656	0.24538
9.1375	0.23954	0.25086
9.1625	0.23681	0.24442
9.1875	0.23357	0.24784
9.2125	0.23022	0.24834
9.2375	0.2477	0.24612
9.2625	0.23179	0.24504
9.2875	0.23847	0.25122
9.3125	0.23543	0.24567
9.3375	0.23954	0.24943
9.3625	0.2396	0.23644
9.3875	0.23492	0.24098
9.4125	0.2419	0.24044
9.4375	0.23206	0.23947
9.4625	0.23625	0.24184
9.4875	0.23082	0.24429
9.5125	0.23018	0.23288
9.5375	0.242	0.24879
9.5625	0.23578	0.2433
9.5875	0.23728	0.23917
9.6125	0.23867	0.24702
9.6375	0.23577	0.23963
9.6625	0.23858	0.2428
9.6875	0.23433	0.23678
9.7125	0.22582	0.24187
9.7375	0.2354	0.24211
9.7625	0.22693	0.23562
9.7875	0.23585	0.24216
9.8125	0.22801	0.23371
9.8375	0.23051	0.24071
9.8625	0.22695	0.24201
9.8875	0.22953	0.23622
9.9125	0.23307	0.24154
9.9375	0.23659	0.24883
9.9625	0.23522	0.24333
9.9875	0.23283	0.2345
10.0125	0.23389	0.22832
10.0375	0.22928	0.23132
10.0625	0.22972	0.23494
10.0875	0.23273	0.24048
10.1125	0.23349	0.24202
10.1375	0.23043	0.23805
10.1625	0.22166	0.23782
10.1875	0.22687	0.23329
10.2125	0.22699	0.23785
10.2375	0.22995	0.23925
10.2625	0.23106	0.23878
10.2875	0.22881	0.23494
10.3125	0.23267	0.23023
10.3375	0.22521	0.2294
10.3625	0.23042	0.23564
10.3875	0.22855	0.22845
10.4125	0.23385	0.23273
10.4375	0.23306	0.24186
10.4625	0.23672	0.23755
10.4875	0.22698	0.23458
10.5125	0.21794	0.23037
10.5375	0.22921	0.23151
10.5625	0.22362	0.2302
10.5875	0.22603	0.22547
10.6125	0.22434	0.23308
10.6375	0.22996	0.21511
10.6625	0.22955	0.22947
10.6875	0.2329	0.22132
10.7125	0.22516	0.23051
10.7375	0.22899	0.23122
10.7625	0.2277	0.23579
10.7875	0.22718	0.22896
10.8125	0.21832	0.23581
10.8375	0.22335	0.23128
10.8625	0.22167	0.24205
10.8875	0.22698	0.22198
10.9125	0.23102	0.22611
10.9375	0.21804	0.21752
10.9625	0.21315	0.23239
10.9875	0.22011	0.22492
11.0125	0.21898	0.2295
11.0375	0.21971	0.22496
11.0625	0.22314	0.22186
11.0875	0.22553	0.22241
11.1125	0.20977	0.21334
11.1375	0.22974	0.22657
11.1625	0.21774	0.23615
11.1875	0.22123	0.22977
11.2125	0.22208	0.23216
11.2375	0.22804	0.22969
11.2625	0.22432	0.22105
11.2875	0.22057	0.22887
11.3125	0.21852	0.22251
11.3375	0.22524	0.22465
11.3625	0.21749	0.23061
11.3875	0.21615	0.22305
11.4125	0.22204	0.23215
11.4375	0.22636	0.21958
11.4625	0.2245	0.22352
11.4875	0.22151	0.23616
11.5125	0.21083	0.23377
11.5375	0.21472	0.22091
11.5625	0.21224	0.23004
11.5875	0.2135	0.22101
11.6125	0.21125	0.23136
11.6375	0.22181	0.22595
11.6625	0.22096	0.23196
11.6875	0.21911	0.21649
11.7125	0.21317	0.21561
11.7375	0.21886	0.21379
11.7625	0.21077	0.22642
11.7875	0.2162	0.2295
11.8125	0.21094	0.22134
11.8375	0.22021	0.22437
11.8625	0.21761	0.23458
11.8875	0.20306	0.24104
11.9125	0.2171	0.2202
11.9375	0.19871	0.21924
11.9625	0.21476	0.21757
11.9875	0.20639	0.21181
12.0125	0.21821	0.21564
12.0375	0.21251	0.21371
12.0625	0.20083	0.22501
12.0875	0.21239	0.21893
12.1125	0.219	0.2036
12.1375	0.2155	0.20726
12.1625	0.21591	0.21973
12.1875	0.21134	0.2203
12.2125	0.20216	0.22419
12.2375	0.20497	0.1959
12.2625	0.21686	0.21824
12.2875	0.20802	0.22708
12.3125	0.20764	0.22507
12.3375	0.19931	0.22699
12.3625	0.22275	0.22557
12.3875	0.2004	0.2157
12.4125	0.20571	0.22058
12.4375	0.21342	0.20392
12.4625	0.2003	0.19915
12.4875	0.21327	0.21899
12.5125	0.19523	0.20814
12.5375	0.21098	0.21061
12.5625	0.2015	0.20363
12.5875	0.20361	0.20925
12.6125	0.20935	0.21033
12.6375	0.21233	0.20952
12.6625	0.20515	0.20331
12.6875	0.20389	0.20797
12.7125	0.20369	0.20645
12.7375	0.20353	0.23946
12.7625	0.20668	0.20703
12.7875	0.20651	0.2023
12.8125	0.20396	0.20091
12.8375	0.19611	0.21129
12.8625	0.19123	0.20193
12.8875	0.21166	0.20512
12.9125	0.20392	0.2092
12.9375	0.19391	0.19584
12.9625	0.20928	0.21087
12.9875	0.20903	0.21731
13.0125	0.21609	0.21163
13.0375	0.20068	0.20885
13.0625	0.20618	0.21577
13.0875	0.23001	0.20477
13.1125	0.20368	0.1987
13.1375	0.22371	0.21228
13.1625	0.19963	0.21377
13.1875	0.1999	0.20997
13.2125	0.21173	0.21381
13.2375	0.20099	0.21297
13.2625	0.20148	0.20477
13.2875	0.19974	0.22168
13.3125	0.19335	0.20901
13.3375	0.19164	0.20358
13.3625	0.18458	0.21328
13.3875	0.21055	0.20802
13.4125	0.19737	0.20656
13.4375	0.19733	0.21903
13.4625	0.2008	0.19312
13.4875	0.20741	0.21223
13.5125	0.21086	0.20141
13.5375	0.19605	0.22339
13.5625	0.20994	0.19401
13.5875	0.21788	0.20339
13.6125	0.2121	0.19421
13.6375	0.19327	0.19309
13.6625	0.20462	0.23241
13.6875	0.20871	0.19267
13.7125	0.19966	0.21405
13.7375	0.20357	0.19808
13.7625	0.19995	0.19854
13.7875	0.19739	0.20825
13.8125	0.19215	0.20212
13.8375	0.19353	0.20439
13.8625	0.20623	0.21466
13.8875	0.1726	0.20318
13.9125	0.19742	0.20581
13.9375	0.20172	0.20692
13.9625	0.19776	0.20664
13.9875	0.19027	0.20893
14.0125	0.17821	0.21638
14.0375	0.19578	0.2125
14.0625	0.19275	0.21467
14.0875	0.19981	0.1904
14.1125	0.16459	0.20682
14.1375	0.18382	0.19798
14.1625	0.17303	0.21024
14.1875	0.20288	0.1896
14.2125	0.20248	0.20448
14.2375	0.18968	0.2158
14.2625	0.19476	0.19115
14.2875	0.2106	0.20925
14.3125	0.18481	0.19075
14.3375	0.19863	0.20514
14.3625	0.18919	0.17142
14.3875	0.19925	0.18623
14.4125	0.18255	0.21049
14.4375	0.18897	0.18658
14.4625	0.17415	0.22307
14.4875	0.18823	0.20029
14.5125	0.20132	0.18769
14.5375	0.19662	0.19877
14.5625	0.18674	0.20394
14.5875	0.18789	0.18489
14.6125	0.20693	0.19972
14.6375	0.20317	0.19383
14.6625	0.19672	0.18112
14.6875	0.21384	0.20793
14.7125	0.20513	0.19974
14.7375	0.18465	0.19556
14.7625	0.1819	0.20272
14.7875	0.18782	0.19914
14.8125	0.19714	0.17871
14.8375	0.19315	0.20075
14.8625	0.18134	0.19595
14.8875	0.17778	0.19941
14.9125	0.18774	0.17638
14.9375	0.18615	0.20021
14.9625	0.20164	0.18619
14.9875	0.18176	0.21013
15.0125	0.1787	0.18795
15.0375	0.18704	0.18612
15.0625	0.19053	0.19044
15.0875	0.1997	0.21474
15.1125	0.18088	0.21185
15.1375	0.18431	0.16572
15.1625	0.1985	0.2095
15.1875	0.16986	0.17791
15.2125	0.17811	0.19441
15.2375	0.18588	0.20654
15.2625	0.19648	0.16101
15.2875	0.19991	0.21149
15.3125	0.17644	0.22616
15.3375	0.18243	0.21232
15.3625	0.17502	0.17393
15.3875	0.18771	0.17985
15.4125	0.18031	0.20851
15.4375	0.19331	0.20304
15.4625	0.18407	0.21023
15.4875	0.16545	0.19785
15.5125	0.17833	0.20696
15.5375	0.18756	0.17166
15.5625	0.18216	0.20734
15.5875	0.16895	0.21495
15.6125	0.19512	0.22312
15.6375	0.17621	0.19492
15.6625	0.18316	0.20133
15.6875	0.19917	0.20733
15.7125	0.14331	0.18449
15.7375	0.16626	0.19431
15.7625	0.1805	0.20319
15.7875	0.19006	0.20326
15.8125	0.17072	0.19257
15.8375	0.18891	0.19734
15.8625	0.17778	0.19511
15.8875	0.17747	0.18393
15.9125	0.18105	0.18343
15.9375	0.17353	0.16046
15.9625	0.15768	0.18264
15.9875	0.16918	0.17994
16.0125	0.18182	0.17508
16.0375	0.17802	0.17982
16.0625	0.16319	0.18809
16.0875	0.16451	0.20097
16.1125	0.18541	0.18076
16.1375	0.1674	0.1846
16.1625	0.16807	0.19492
16.1875	0.18452	0.20277
16.2125	0.17533	0.19324
16.2375	0.18304	0.1889
16.2625	0.16962	0.19002
16.2875	0.17055	0.19733
16.3125	0.18833	0.17562
16.3375	0.16463	0.17254
16.3625	0.19367	0.17276
16.3875	0.14907	0.19078
16.4125	0.18989	0.17127
16.4375	0.18439	0.18506
16.4625	0.17259	0.19597
16.4875	0.19231	0.17453
16.5125	0.1483	0.17722
16.5375	0.17288	0.20159
16.5625	0.16643	0.2191
16.5875	0.17464	0.18886
16.6125	0.15811	0.19471
16.6375	0.15945	0.20149
16.6625	0.17869	0.18983
16.6875	0.17038	0.1933
16.7125	0.1554	0.18045
16.7375	0.17712	0.19519
16.7625	0.15975	0.20152
16.7875	0.15784	0.15701
16.8125	0.19485	0.1661
16.8375	0.17722	0.1696
16.8625	0.18875	0.16527
16.8875	0.17584	0.19684
16.9125	0.1853	0.18919
16.9375	0.16248	0.17998
16.9625	0.17503	0.185
16.9875	0.19185	0.18339
17.0125	0.1612	0.17574
17.0375	0.17113	0.17696
17.0625	0.15571	0.19387
17.0875	0.16709	0.15675
17.1125	0.16854	0.17
17.1375	0.16314	0.18197
17.1625	0.1823	0.17513
17.1875	0.16074	0.20206
17.2125	0.16849	0.14477
17.2375	0.17175	0.19527
17.2625	0.16711	0.18941
17.2875	0.16441	0.19522
17.3125	0.1751	0.13494
17.3375	0.18201	0.17716
17.3625	0.19294	0.1826
17.3875	0.17857	0.16374
17.4125	0.16289	0.17525
17.4375	0.13669	0.16636
17.4625	0.16474	0.18264
17.4875	0.15871	0.21278
17.5125	0.15677	0.18613
17.5375	0.14602	0.15672
17.5625	0.17688	0.18148
17.5875	0.15725	0.16993
17.6125	0.15122	0.1721
17.6375	0.15056	0.1777
17.6625	0.14243	0.14834
17.6875	0.1794	0.17372
17.7125	0.16953	0.20391
17.7375	0.16993	0.19022
17.7625	0.16945	0.13602
17.7875	0.17196	0.20266
17.8125	0.15812	0.15437
17.8375	0.16059	0.16914
17.8625	0.16094	0.16915
17.8875	0.19377	0.19785
17.9125	0.18643	0.16128
17.9375	0.17618	0.1844
17.9625	0.13981	0.13498
17.9875	0.14222	0.18954
18.0125	0.17333	0.15422
18.0375	0.15358	0.16369
18.0625	0.14337	0.15611
18.0875	0.15425	0.1852
18.1125	0.17906	0.18224
18.1375	0.16831	0.17141
18.1625	0.14674	0.14184
18.1875	0.17608	0.15723
18.2125	0.17244	0.14413
18.2375	0.14578	0.20136
18.2625	0.17906	0.18287
18.2875	0.16554	0.17069
18.3125	0.13663	0.12817
18.3375	0.17606	0.16308
18.3625	0.15319	0.1716
18.3875	0.18851	0.17491
18.4125	0.1587	0.15633
18.4375	0.17709	0.13082
18.4625	0.18509	0.19278
18.4875	0.14596	0.18065
18.5125	0.21862	0.13413
18.5375	0.15262	0.17467
18.5625	0.18255	0.21105
18.5875	0.14621	0.14361
18.6125	0.15602	0.214
18.6375	0.18741	0.15989
18.6625	0.12439	0.18603
18.6875	0.13059	0.16786
18.7125	0.16906	0.21541
18.7375	0.17643	0.21331
18.7625	0.18389	0.20055
18.7875	0.15539	0.17849
18.8125	0.14512	0.18653
18.8375	0.13078	0.17544
18.8625	0.19289	0.14002
18.8875	0.16045	0.17935
18.9125	0.14421	0.1722
18.9375	0.16192	0.17438
18.9625	0.17517	0.17879
18.9875	0.17613	0.15769
19.0125	0.17185	0.15732
19.0375	0.16184	0.13158
19.0625	0.17045	0.16406
19.0875	0.15941	0.18098
19.1125	0.14335	0.15457
19.1375	0.20464	0.15315
19.1625	0.14215	0.18866
19.1875	0.16864	0.17898
19.2125	0.14681	0.13703
19.2375	0.15613	0.18548
19.2625	0.1706	0.19479
19.2875	0.1794	0.20119
19.3125	0.17188	0.13505
19.3375	0.1404	0.15841
19.3625	0.13005	0.17881
19.3875	0.14632	0.17314
19.4125	0.15983	0.15281
19.4375	0.18131	0.18938
19.4625	0.16231	0.17033
19.4875	0.21083	0.1681
19.5125	0.116	0.16078
19.5375	0.15819	0.15273
19.5625	0.17964	0.16203
19.5875	0.15276	0.1544
19.6125	0.16765	0.15815
19.6375	0.11747	0.14
19.6625	0.1686	0.2062
19.6875	0.17376	0.14417
19.7125	0.14889	0.17935
19.7375	0.17759	0.20718
19.7625	0.18351	0.18992
19.7875	0.17348	0.18289
19.8125	0.15715	0.11621
19.8375	0.22591	0.14175
19.8625	0.16393	0.16709
19.8875	0.13956	0.18774
19.9125	0.19469	0.14979
19.9375	0.1119	0.14345
19.9625	0.16974	0.19628
19.9875	0.18227	0.20613
20.0125	0.15309	0.15858
20.0375	0.20163	0.17331
20.0625	0.16205	0.17039
20.0875	0.18707	0.17404
20.1125	0.1541	0.22653
20.1375	0.17774	0.18182
20.1625	0.11189	0.17904
20.1875	0.15416	0.17404
20.2125	0.14095	0.18993
20.2375	0.14984	0.13655
20.2625	0.18869	0.13343
20.2875	0.13793	0.14675
20.3125	0.20901	0.16957
20.3375	0.17883	0.17053
20.3625	0.1655	0.16412
20.3875	0.18148	0.10714
20.4125	0.12609	0.14379
20.4375	0.16856	0.1584
20.4625	0.19035	0.15467
20.4875	0.17847	0.11581
20.5125	0.15012	0.22134
20.5375	0.13123	0.18786
20.5625	0.12272	0.17582
20.5875	0.14684	0.19175
20.6125	0.17046	0.18982
20.6375	0.1363	0.24348
20.6625	0.1793	0.18292
20.6875	0.16976	0.15147
20.7125	0.10696	0.14463
20.7375	0.1225	0.10727
20.7625	0.15571	0.18364
20.7875	0.1357	0.17367
20.8125	0.15126	0.1504
20.8375	0.17376	0.16398
20.8625	0.11615	0.13613
20.8875	0.13056	0.14636
20.9125	0.17489	0.12413
20.9375	0.13374	0.16012
20.9625	0.13559	0.2207
20.9875	0.13037	0.18233
21.0125	0.15373	0.14601
21.0375	0.18447	0.15559
21.0625	0.17303	0.17653
21.0875	0.13739	0.21863
21.1125	0.15213	0.08804
21.1375	0.18306	0.10811
21.1625	0.15172	0.12651
21.1875	0.18724	0.19463
21.2125	0.16279	0.13441
21.2375	0.20988	0.12598
21.2625	0.14082	0.17155
21.2875	0.13669	0.16928
21.3125	0.20455	0.21684
21.3375	0.13981	0.13528
21.3625	0.1248	0.17241
21.3875	0.14858	0.16864
21.4125	0.15565	0.1677
21.4375	0.13462	0.1
21.4625	0.12649	0.21101
21.4875	0.19548	0.12982
21.5125	0.11795	0.19094
21.5375	0.10424	0.11694
21.5625	0.13	0.15692
21.5875	0.13884	0.1766
21.6125	0.18322	0.25558
21.6375	0.11345	0.21886
21.6625	0.12885	0.16279
21.6875	0.16579	0.12471
21.7125	0.06655	0.17532
21.7375	0.17232	0.16769
21.7625	0.19498	0.2029
21.7875	0.16034	0.14334
21.8125	0.16821	0.10508
21.8375	0.21887	0.20465
21.8625	0.14205	0.21237
21.8875	0.13722	0.15493
21.9125	0.15953	0.10135
21.9375	0.15707	0.16058
21.9625	0.13564	0.09235
21.9875	0.14244	0.18734
22.0125	0.24009	0.07477
22.0375	0.14366	0.15167
22.0625	0.17008	0.14286
22.0875	0.1118	0.13239
22.1125	0.14369	0.05991
22.1375	0.16544	0.15863
22.1625	0.15033	0.14593
22.1875	0.15369	0.19141
22.2125	0.2	0.1837
22.2375	0.22096	0.19167
22.2625	0.17318	0.14005
22.2875	0.13878	0.0963
22.3125	0.13132	0.16917
22.3375	0.15044	0.26039
22.3625	0.11301	0.12148
22.3875	0.14383	0.19
22.4125	0.14565	0.12727
22.4375	0.16216	0.19621
22.4625	0.08904	0.08179
22.4875	0.11333	0.15048
22.5125	0.10759	0.18258
22.5375	0.15726	0.13617
22.5625	0.18317	0.17241
22.5875	0.16531	0.16327
22.6125	0.15464	0.10823
22.6375	0.10274	0.16848
22.6625	0.13295	0.18142
22.6875	0.125	0.1365
22.7125	0.18545	0.131
22.7375	0.14387	0.05075
22.7625	0.16015	0.13088
22.7875	0.13947	0.10473
22.8125	0.12687	0.12629
22.8375	0.14333	0.1635
22.8625	0.22905	0.11656
22.8875	0.1032	0.14091
22.9125	0.09701	0.17771
22.9375	0.1406	0.13303
22.9625	0.09375	0.22302
22.9875	0.12843	0.18687
23.0125	0.19802	0.13505
23.0375	0.14407	0.10508
23.0625	0.18672	0.13322
23.0875	0.14286	0.09366
23.1125	0.15264	0.14087
23.1375	0.20821	0.19
23.1625	0.125	0.12231
23.1875	0.18487	0.16129
23.2125	0.16971	0.12459
23.2375	0.09375	0.10596
23.2625	0.21283	0.18382
23.2875	0.09659	0.08432
23.3125	0.09669	0.17883
23.3375	0.13848	0.11413
23.3625	0.14167	0.11828
23.3875	0.16309	0.15702
23.4125	0.13383	0.08056
23.4375	0.12742	0.19435
23.4625	0.14286	0.09302
23.4875	0.13663	0.19355
23.5125	0.15543	0.22931
23.5375	0.1745	0.10596
23.5625	0.14696	0.14205
23.5875	0.17476	0.18127
23.6125	0.18487	0.18293
23.6375	0.16	0.21359
23.6625	0.19048	0.09559
23.6875	0.21739	0.14134
23.7125	0.13861	0.2439
23.7375	0.13453	0.14359
23.7625	0.24211	0.20522
23.7875	0.10648	0.14038
23.8125	0.11765	0.15192
23.8375	0.15094	0.19792
23.8625	0.1348	0.15217
23.8875	0.09665	0.22439
23.9125	0.12026	0.14367
23.9375	0.15741	0.10105
23.9625	0.20526	0.1378
23.9875	0.14646	0.15152
24.0125	0.06312	0.17669
24.0375	0.20385	0.13934
24.0625	0.16892	0.11698
24.0875	0.13481	0.17949
24.1125	0.13806	0.15745
24.1375	0.13472	0.12651
24.1625	0.08185	0.15854
24.1875	0.11675	0.17354
24.2125	0.15724	0.20206
24.2375	0.17276	0.05747
24.2625	0.1413	0.14387
24.2875	0.19512	0.22368
24.3125	0.19718	0.13497
24.3375	0.21154	0.09607
24.3625	0.10922	0.17647
24.3875	0.1954	0.13261
24.4125	0.08966	0.14286
24.4375	0.22199	0.1153
24.4625	0.07435	0.23188
24.4875	0.14684	0.15258
24.5125	0.06742	0.25322
24.5375	0.12797	0.21333
24.5625	0.10403	0.06987
24.5875	0.10291	0.18736
24.6125	0.16346	0.10458
24.6375	0.15493	0.12563
24.6625	0.11765	0.16097
24.6875	0.15164	0.06494
24.7125	0.17901	0.14189
24.7375	0.11579	0.08949
24.7625	0.13384	0.14588
24.7875	0.16802	0.11594
24.8125	0.16532	0.09845
24.8375	0.1359	0.176
24.8625	0.25	0.14463
24.8875	0.14199	0.18538
24.9125	0.11364	0.11765
24.9375	0.13978	0.22115
24.9625	0.12093	0.26286
24.9875	0.16934	0.1075
25.0125	0.08861	0.20168
25.0375	0.11837	0.10667
25.0625	0.09589	0.18919
25.0875	0.1244	0.17241
25.1125	0.07216	0.14525
25.1375	0.15888	0.26066
25.1625	0.15419	0.15696
25.1875	0.09434	0.07194
25.2125	0.06855	0.12676
25.2375	0.06872	0.16121
25.2625	0.14667	0.04762
25.2875	0.15278	0.08629
25.3125	0.0625	0.11765
25.3375	0.08333	0.13217
25.3625	0.13889	0.21875
25.3875	0.14661	0.15152
25.4125	0.14085	0.14824
25.4375	0.11211	0.01471
25.4625	0.1674	0.11364
25.4875	0.01449	0.16346
25.5125	0.15854	0.14409
25.5375	0.075	0.18593
25.5625	0.21198	0.17094
25.5875	0.15854	0.09659
25.6125	0.1407	0.20859
25.6375	0.03548	0.14045
25.6625	0.06464	0.27848
25.6875	0.20053	0.14641
25.7125	0.00985	0.13793
25.7375	0.06923	0.1068
25.7625	0.205	0.2349
25.7875	0.12113	0.17941
25.8125	0.11111	0.11919
25.8375	0.11055	0.12195
25.8625	0.1937	0.18487
25.8875	0.07489	0.23913
25.9125	0.14655	0.18732
25.9375	0.11429	0.04142
25.9625	0.15974	0.21271
25.9875	0.11548	0.10272
26.0125	0.11856	0.16477
26.0375	0.1738	0.17895
26.0625	0.24227	0.24
26.0875	0.19008	0.08264
26.1125	0.14754	0.11765
26.1375	0.25223	0.06628
26.1625	0.085	0.04608
26.1875	0.14745	0.19162
26.2125	0.18873	0.19941
26.2375	0.09302	0.23125
26.2625	0.10705	0.14286
26.2875	0.19355	0.28082
26.3125	0.20615	0.19578
26.3375	0.06952	0.25
26.3625	0.20205	0.1853
26.3875	0.1555	0.16667
26.4125	0.13659	0.22
26.4375	0.10989	0.2
26.4625	0.20645	0.15217
26.4875	0.14648	0.13622
--	--	--
--	--	--
--	--	--
--	--	--
--	--	--
--	--	--
--	--	--
--	--	--
--	--	--
--	--	--
--	--	--
--	--	--
--	--	--
--	--	--
--	--	--
--	--	--
--	--	--
--	--	--
--	--	--
--	--	--
--	--	--
